21 **Title:** Detecting spatial dynamics of range expansions with geo-referenced genome-wide SNP  
22 data and the geographic spectrum of shared alleles

23 **ABSTRACT**

24       Uncovering the spatial dynamics of range expansions is a major goal in studies of  
25 historical demographic inference, with applications ranging from understanding the evolutionary  
26 origins of domesticated crops, epidemiology, invasive species, and understanding species-level  
27 responses to climate change. Following the surge in advances that make explicit use of the  
28 spatial distribution of genetic data from geo-referenced SNP variants, we present a novel  
29 summary statistic vector, the geographic spectrum of shared alleles (GSSA). Using simulations  
30 of two-dimensional serial expansion, we find that the information from the GSSA, summarized  
31 with Harpending's Raggedness Index (RI), can accurately detect the spatial origins of a range  
32 expansion under serial founder models, even with sparse sampling of only ten individuals. When  
33 applying to SNP data from two species of the holarctic butterfly genus *Lycaeides*, the suggested  
34 origins of expansion are consistent with hindcasts obtained from ecological niche models  
35 (ENMs). These results demonstrate the GSSA to be a useful exploratory tool for generating  
36 hypotheses of range expansion with genome-wide SNP data. Our simulation experiments suggest  
37 high performance even with sampling found in studies of non-model organisms (one sampled  
38 individual per location, no outgroup information, and only 5,000 SNP loci).

39 **Keywords:** demographic history, range expansion, geographic spectrum of shared alleles,  
40 summary statistic

## 41 Introduction

42 Geographic range shifts are a prevalent feature of virtually all species' histories. They  
43 often follow or accompany the origin of species (Gaston 2003), and frequently happen in  
44 response to changes in climate, landscape, or biotic opportunities (Konečný *et al.* 2013; Roberts  
45 & Hamann 2015). Despite range expansions being a pervasive feature across many species  
46 histories, the net outcomes of the interactions between species-specific traits and changes in  
47 suitable habitats are poorly understood with regards to changes in the geographic distribution of  
48 genetic diversity, adaptability, and community structure (Pharo & Zartman 2007; Thuiller *et al.*  
49 2008; Phillips *et al.* 2010). For example, although serial-range expansions are likely a common  
50 feature of species histories in the context of past global changes (Excoffier *et al.* 2009), there is  
51 still uncertainty about how they affect differentiation and diversification, or how they influence  
52 the risk of extinction under future environmental shifts (Charles & Dukes 2008; Fordham *et al.*  
53 2014). Tools that uncover the spatio-temporal dynamics of species' ranges are therefore critical  
54 for understanding how geographic range dynamics affect the spatial distribution of genetic  
55 diversity through drift and selection (Slatkin 1987; Kirkpatrick & Barton 1997; Peischl *et al.*  
56 2013). They are also central to forecast species' responses to ongoing and future environmental  
57 changes (Brown *et al.* 2016).

58 Among recent attempts to couple genetic and spatial information to infer historical range  
59 dynamics, Ramachandran *et al.* (2005) proposed to identify the geographic origin of an expansion  
60 using heterozygosity clines that result from the reduction of heterozygosity associated with the  
61 sequential founder events that are characteristic of range expansions (Ramachandran *et al.* 2005;  
62 Li *et al.* 2008; DeGiorgio *et al.* 2009; Henn *et al.* 2012). Based on the premise that

63 heterozygosity should continuously decrease with distance from the expansion source, this  
64 method fits a linear regression between expected heterozygosity at multiple sampled locations  
65 and their geographic distance from all possible candidate sources. While this is simple to  
66 estimate, this approach has been found to perform well under a relatively narrow range of  
67 circumstances, with its accuracy decreasing as the speed of the expansion decreases, or as the  
68 time since the end of the expansion increases (Peter & Slatkin 2015). Previously, researchers  
69 have used principal component analysis (PCA) of geo-referenced samples to identify the  
70 direction of expansion under the assumption that the first principal component—which accounts  
71 for the greatest amount of variation—aligns with the expansion source-front axis (Menozzi *et al.*  
72 1978). However, this assumption has been challenged by recent evidence indicating that the  
73 geographic alignment of the first component may be driven by the geographic distribution of  
74 samples, allele surfing, or mathematical artifacts (Novembre & Stephens 2008; François *et al.*  
75 2010; Pemberton *et al.* 2013).

76 More recently, Peter and Slatkin (2013) proposed a new statistic, the directionality index  
77 ( $\psi$ ), to detect the origins of range expansions using joint geo-referenced and genome-wide  
78 information. This statistic takes advantage of allele frequency changes driven by the sequential  
79 founder events that often characterize expansions. Specifically,  $\psi$  detects asymmetries in 2D site  
80 frequency spectra of shared neutral non-ancestral alleles between pairs of populations, under the  
81 theoretical expectation that populations further away from the expansion have experienced more  
82 genetic drift than populations near the expansion source (Slatkin & Excoffier 2012; Peter &  
83 Slatkin 2013). This metric has been also incorporated into an ABC framework, whereby He *et al.*  
84 (2017) used it to estimate the source of range expansion in the Collared pika in Alaska.

85           While analyses using the directionality index (Peter & Slatkin 2015) have been highly  
86 promising, the relatively high number of sampled individuals, and the requirement of polarized  
87 SNPs, make its implementation difficult in non-model organisms, which are typically  
88 characterized by limited numbers of geo-referenced genotypes, or for which a reliable outgroup  
89 for polarizing SNPs has not been identified. Here we develop a summary statistic vector, which  
90 we call the geographic spectrum of shared alleles (GSSA, hereafter), to harvest information from  
91 the spatial distribution of shared allelic variants to help identify the geographical origin of range  
92 expansions. Our approach is targeted for non-model organisms as it does not require information  
93 about ancestral states, requires a single individual per sampled location, and can accommodate a  
94 reasonable number of SNPs.

95           We formally describe the GSSA summary statistic vector and use two-dimensional  
96 simulations of different expansion histories to statistically explore its behavior. We also  
97 demonstrate its applicability with genome-wide SNP data sampled from a set of taxa of the  
98 holartic butterfly genus *Lycaeides* distributed in Western North America (Gompert *et al.* 2010).  
99 Our analyses demonstrate that the GSSA can be a powerful exploratory tool to identify the  
100 relative position of samples along an expansion axis. In *Lycaeides*, the GSSA places the origin of  
101 expansions in geographical areas that are consistent with species distribution models for  
102 hypothesized ranges shifts during the last glacial maximum.

## 103 **Materials and Methods**

### 104 **The geographic spectrum of shared alleles (GSSA)**



105           The Geographic Spectrum of Shared Alleles (GSSA) is a property of—and calculated  
106 for—each sampled locality. It captures the geographic distribution of shared co-ancestry with  
107 other localities by summarizing the geographic distances between copies of the minor allele  
108 observed at each SNP site (that is, the allele with the smallest frequency in the global sample for  
109 each site; Nielsen et al. 2012). As such, the GSSA of a given location is a histogram that depicts  
110 the cumulative frequency distribution of the geographic distances separating each minor allele  
111 shared between the focal location and all other sampled locations across all SNPs (Fig. 1). On an  
112 intuitive level, this new summary statistic vector can be understood as a spatial structure function  
113 that captures the relative change in allelic similarity from a focal location as a function of  
114 geographic distance. Importantly, the GSSA is a location-specific statistic which differs from  
115 other structure functions such as spatial correlograms that are globally calculated. These latter  
116 statistics quantify the spatial dependence of an observed variable across the entire set of  
117 observations using a covariance matrix partitioned into distance classes (Smouse & Peakall  
118 1999; Legendre & Legendre 2012). Instead, each location-specific GSSA is directly based on  
119 distances between minor alleles shared with a focal locality.

120           The information captured in the GSSA helps identify the relative position of each  
121 sampling location with respect to the expansion source-front axis, because the similarity in  
122 genetic constitution between locations depends on the extent of shared history under an  
123 expansion history (Peter & Slatkin 2015; Bradburd *et al.* 2016). Because the amount of genetic  
124 drift increases with distance to the source of an expansion (Slatkin & Excoffier 2012; Peter &  
125 Slatkin 2013), and because colonization through different geographic paths should lead to allelic  
126 segregation (Hallatschek *et al.* 2007; Knowles & Alvarado-Serrano 2010; François *et al.* 2010),

127 the amount of shared genetic variants can potentially further inform about the direction of the  
128 expansion. As such, if this information is captured by our summary statistic vector, it could be  
129 useful in a simulation-based statistical method—such as approximate Bayesian computation or  
130 supervised machine learning—for testing alternative expansion histories (Pudlo *et al.* 2015;  
131 Joseph *et al.* 2016; Schrider & Kern 2018).

### 132 **GSSA overview**

133 The calculation of the set of GSSAs, one per unique sampled geo-referenced location,  
134 requires two sets of data: i) the geographic distances between all sampled locations, and ii) a  
135 record of the counts of minor allele copies of each SNP locus at each sampled location (Fig. 1a).  
136 Here, we restrict our discussion to geographic distance between samples, but note that users  
137 could use an alternative distance metric, such as river-distance, when appropriate. Below we  
138 verbally summarized the steps involved in the calculation of the GSSA for one sampled location  
139 (a formal mathematical description is presented in the next section).

140 First, using the entire set of geographic distances between all sampled locations, the  
141 Sturges (1926) equation is deployed to identify the optimal number of geographic distance  
142 classes and breakpoints for the construction of all of the location-specific GSSAs. This Sturges  
143 binning scheme is then applied to the set of geographic distances associated with the  $i$ th focal  
144 sampled location, such that there will be a specific histogram ( $h_{geo_i}$ ) for each of the locations  
145 (Fig. 1e). Second, a matrix of minor allele's presence/absence ( $G_i$ ) is constructed for the  $i$ th focal  
146 sampled location (Fig. 1a). Third, a vector ( $\vec{S}_i$ ) is constructed for the  $i$ th focal sampled location  
147 from the geographic distribution of minor alleles. Specifically, each location-specific  $\vec{S}_i$  vector

148 lists the geographic distances between each minor SNP allele present at the focal sampling  
149 location and all other copies of the same minor allele in the entire sample (Fig. 1c). Fourth, this  
150 location-specific vector is then converted into a corresponding location-specific histogram ( $h_{gen_i}$   
151 ) using the Sturges' (1927) binning scheme previously defined (Fig. 1d). Finally, to make our  
152 statistic independent of the specific sampling scheme (i.e., sampling locations and their influence  
153 on the binning scheme), the location-specific histogram constructed from the vector of distances  
154 between minor alleles ( $h_{gen_i}$ ) is regressed against the values from the corresponding  
155 “geography-only” histogram ( $h_{geo_i}$ ; i.e., the “null” distribution of geographic distances). The  
156 residuals from this regression are finally used to build the location-specific histogram for the  $i$ th  
157 focal location ( $GSSA_i$ ).

## 158 **GSSA calculation**

159 Formally, the two sets of data extracted from the series of georeferenced sampled  
160 genotypes can be defined as two matrices. With one individual per sampled location,  $I$  locations,  
161  $M$  sets of chromosomes (i.e., ploidy), and  $L$  loci (i.e., SNPs), the arrangement of minor alleles in  
162 the entire sample relative to each location can be characterized by a  $M \times L$  genotype matrix,  $G_i$ ,  
163 where each element  $G_{i,m,l}$  takes the value of 0 or 1, depending on whether a copy of the minor  
164 allele is present (1) or not (0) at each individual's SNP locus and DNA strand (note that phasing  
165 is not necessary because the method treats each locus independently; Fig. 1a). In turn, the set of  
166 Euclidean or effective (Shirk & Cushman 2014; Davis *et al.* 2018) geographic distances between  
167 all locations can be characterized by an  $I \times I$  square distance matrix,  $D$ , where  $D_{i,i} = 0$  and  $D_{ij} =$   
168  $D_{j,i}$ . From this latter matrix, a set of location-specific geographic-distances vectors,  $\vec{d}_i$ , can be

169 obtained by subsetting the D matrix so that  $\vec{d}_i = D_{i,1:I}$  (Fig. 1b). Altogether, these data are used  
 170 to construct a GSSA summary statistic vector for each sampled location following five steps:

171 *Step 1.* First Sturges' (Sturges 1926) equation is applied to the set of pairwise geographic  
 172 distances between all localities contained in matrix  $D$  to identify an optimal series of consecutive  
 173 distance classes that are later used for histogram binning. We chose Sturges' (1926) equation for  
 174 its simplicity and common use in biological research (Ramírez-García *et al.* 1998; Fagua &  
 175 Gonzalez 2007; Pires *et al.* 2016; Cardozo *et al.* 2018). Although alternative binning schemes  
 176 would in theory be possible, an exploration of a coarser binning scheme (Scott 1979) and the  
 177 more granular Rice rule (Jones *et al.* 2001--)) showed that although Sturges' scheme resulted in  
 178 relatively better performance with regards to the dynamics of the GSSA and identification of  
 179 expansion colonization history, accuracy was good across all three binning schemes (Supp. Fig.  
 180 1).

181 *Step 2.* Each genotype matrix  $G_i$  is used to construct a location-specific vector,  $\vec{S}_i$ , which  
 182 summarizes the aggregated relative spatial distribution of minor alleles at location  $i$  (Fig. 1c).

183 The elements of this vector are defined as:

$$184 \quad s_{i,m,l} = \begin{cases} \emptyset & \text{when } (G_{i,m,l} * G_{j,m,l}) = 0 \\ D_{i,j} & \text{when } (G_{i,m,l} * G_{j,m,l}) \neq 0 \end{cases}; \quad s_{i,m,l} \in \vec{S}_i \quad \wedge \quad j \in \{1:I\} \quad [1a];$$

185 where  $\emptyset = \text{null}$ ,  $G_{i,m,l}$  = element of individual  $i$ 's genotype matrix that denotes the presence or  
 186 absence of a minor allele at locus  $l$ , strand  $m$ , and  $D_{i,j}$  = geographic distance between localities  $i$   
 187 and  $j$ . Elements in the  $\vec{S}_i$  vector with a value of zero correspond to instances in which the same  
 188 minor allele at a SNP locus is homozygous within an individual or present in more than one

189 individual sampled from the same locality because the geographic distance between these allele  
 190 copies would be zero ( $D_{ii} = 0$ ). On the other hand, non-zero elements correspond to the  
 191 geographic distances between individuals from different localities sharing the same minor allele  
 192 at a SNP locus (Fig. 1c). Effectively,  $\vec{S}_i$  can also be derived from the frequency of the minor  
 193 allele at each locus and location by aggregating over DNA strands so that the set of  $\vec{S}_{i_{m_1:M,l}}$   
 194 elements of this vector are defined as:

$$s_{i_{m_1:M,l}} = \left\{ \underbrace{\langle D_{i,j} \rangle}_{(f_i \times f_j) \text{ times}} \right\}; \quad s_{i_{m,l}} \in \vec{S}_i \quad \wedge \quad j \in \{1:I\} \quad [1b];$$

196 where  $f_i$  is the frequency of copies of the minor allele at location  $i$ , locus  $l$  and  $D_{ij}$  as in eq. [1a].

197 *Step 3.* After removing all null elements ( $\emptyset$ ) from vector  $\vec{S}_i$  (Fig. 1c), which number  
 198 depends on the number of loci at which each locality does not contain a minor allele copy (Fig.  
 199 1a), the size of each  $\vec{S}_i$  varies among locations. Therefore, it is necessary to compress each  $\vec{S}_i$   
 200 into a vector with an equal number of elements for all individual sampled locations. To do this,  
 201 each vector  $\vec{S}_i$  (Fig. 1c) is converted into a histogram by calculating the frequency of  $\vec{S}_i$   
 202 elements that fall within each of the distance classes previously determined in *Step 1*. The  
 203 resulting location-specific geo-genetic histogram ( $h_{gen_i}$ ) summarizes the relative spatial  
 204 distribution of minor alleles copies across loci present at each ( $i^{\text{th}}$ ) sampling location (Fig. 1d).

205 *Step 4.* To correct for the “null” geographic expectation introduced by the specific  
 206 geographic position of each sample, each location-specific vector of geographic-distances,  $\vec{d}_i$ , is  
 207 first converted into a histogram by again estimating the frequency of observations that fall within

208 each of the same set of distance classes previously used to create the geo-genetic histograms.

209 This generates a unique geographic histogram ( $h_{geo_i}$ ) for each ( $i^{\text{th}}$ ) location that is analogous to  
210 the corresponding geo-genetic histograms ( $h_{gen_i}$ ) (Fig. 1e), yet that only containing geographic  
211 information.

212 *Step 5.* Finally, the elements of each geo-genetic histogram ( $h_{gen_i}$ ) are regressed against  
213 the corresponding elements of the geographic-distance histogram ( $h_{geo_i}$ ) (Fig. 1f), as defined  
214 here:

$$215 \quad \hat{h}_{gen_i[b_{k=1}:b_{k=K}]} = \beta \left( h_{geo_i[b_{k=1}:b_{k=K}]} \right) + \varepsilon \quad [2];$$

216 where  $h_{gen_i}$  = geo-genetic histogram for location  $i$ ,  $h_{geo_i}$  = geographic histogram for location  $i$ ,  
217  $[b_k]$  = histogram's distance class,  $b$ , ranging from  $k = 1$  to  $k = K$  (i.e., the maximum number of  
218 bins as determined by Sturges' equation),  $\beta$  = simple regression coefficient, and  $\varepsilon$  = error term.

219 The vector of absolute residuals resulting from each regression (eq. [2]) constitutes the  
220 location-specific spatial summary statistic vector we named the GSSA and it is defined for each  
221 location  $i$  as the absolute difference between the location-specific regression-predicted values  
222 (eq. [2]) and the location-specific geo-genetic histogram values:

$$223 \quad GSSA_i = \left| \hat{h}_{gen_i[b_{k=1}:b_{k=K}]} - h_{gen_i[b_{k=1}:b_{k=K}]} \right| \quad [3];$$

224 with  $\hat{h}_{gen_i}$ ,  $h_{gen_i}$ , and  $[b_k]$  defined as in eq. [2].

## 225 **GSSA Implementation**

226 All five steps described above can be implemented from a list of genotypes and a list of  
227 individuals' sampling coordinates, or optionally a set of distances between genotypes in case  
228 users choose to use effective distances instead (Shirk & Cushman 2014; Davis *et al.* 2018). The  
229 aggregated relative spatial distribution of minor alleles vector for each locality,  $\vec{S}_i$ , can be  
230 obtained from the multi-site frequency spectrum (multiSFS), which summarizes the frequency of  
231 shared allele variants across populations, and the set of distances among all sampled locations.  
232 This multiSFS can be calculated from the list of genotypes in available programs such as  $\delta a \delta i$ ,  
233 whereby the multiSFS should be polarized based on the minor allele where each sampled  
234 geo-referenced location is considered a "population" in the multiSFS (Gutenkunst *et al.* 2009).  
235 Scripts to estimate the multiSFS along the rest of necessary steps to calculate the GSSAs for each  
236 location are available at [https://bitbucket.org/diegofalvarado-s/gssa\\_v0.0/src](https://bitbucket.org/diegofalvarado-s/gssa_v0.0/src). If multiple  
237 individuals per location are available, the method can be adapted by aligning all genotypes per  
238 location into a single "polyploid individual" so that individuals' genotypes are treated as  
239 different DNA strands. Similarly, polyploid individuals are likewise accommodated as the  
240 method treats each SNP locus independently and thus, no phasing is necessary.

## 241 **Raggedness index**

242 A useful property of the GSSA is that its shape can potentially carry information about a  
243 location's relative age of colonization and its historical connectivity with other populations given  
244 an expansion history. To explore and summarize the overall behavior of the GSSA with respect  
245 to expansion sources, we use Harpending's raggedness index (Harpending 1994). Harpending's  
246 raggedness index (RI) was originally introduced to quantify the shape of the histogram obtained

247 from the average pairwise genetic differences amongst individuals in the context of inferring the  
248 history of population size change due to the predictive relationships between the shape and the  
249 timing and magnitude of size change. Here we repurpose it to condense the GSSA elements into  
250 a single variable that is correlated with the shape of the GSSA and thus, summarizes the behavior  
251 of the GSSA and its spatial and temporal relationship with the expansion source. In our  
252 calculation of each locality-specific RI, we disregard all distance classes within each GSSA<sub>i</sub> that  
253 are equivalent to the distance classes in the corresponding  $h_{geo_i}$  that have a value of zero (which  
254 arise for distance classes not involving the focal locality). We then correct the RI for the number  
255 of comparisons used for its calculation:

$$256 \quad RI = \frac{\sum_{b_k=2}^{b_k=K} (b_k - b_{k-1})^2}{K' - 1}; \quad b_k \in GSSA_i \mid h_{geo_{b_k}} \neq 0 \quad [3],$$

257 where  $b_k$  indicates a distance class and  $K'$  the total number of distance classes used in the  
258 calculation.

259 Locations further away from the serial-expansion source are expected to share more  
260 genetic variants with nearby locations that were colonized through the same expansion path  
261 (Knowles & Alvarado-Serrano 2010), and hence should tend to present a left-skewed and more  
262 ragged GSSA (Supp. Fig. 2a). This is because, in this case, short distance bins should be overly  
263 represented with a marked drop at intermediate bins, thereby inflating the RI from the  
264 “neighborhood effect” resulting from allele surfing (Hallatschek & Nelson 2008; François *et al.*  
265 2010). This process can cause genetic variants at the expansion front to increase in frequency  
266 within constrained areas of derived populations (Excoffier *et al.* 2008). In contrast, locations  
267 closer to the source should tend to have a more uniform and non-skewed GSSA histogram



268 because these locations are expected to retain the shared genetic variants present at different  
269 frequencies in other locations in the sample. In this latter scenario (Supp. Fig. 2b), most variants  
270 come from standing genetic variation in the source population due to the comparatively smaller  
271 amount of drift experienced by these close-to-source populations (Excoffier *et al.* 2008; Peter &  
272 Slatkin 2013).

### 273 **Simulation experiments**

274 To evaluate the behavior of the GSSA, we simulated 5,000 unlinked SNPs sampled from  
275 10 spatially separated individuals under different serial range expansion histories, where 99  
276 demes are colonized by a single source deme. Spatially implicit simulations were conducted  
277 using fastsimcoal v2.5.2 (Excoffier & Foll 2011; Excoffier *et al.* 2013), with each simulation  
278 starting with a source deme at either of four different starting locations (Fig. 2). At each  
279 sequential expansion step going forward in time, we set a proportion of individuals within each  
280 deme ( $f$ ) to move out from the demes they occupied into an immediate neighboring deme,  
281 excluding diagonal movements (i.e., 4-neighbors). We set newly colonized demes to then grow  
282 to a size  $N_K$  (based on the carrying capacity parameter), in  $\tau_r$  generations. After  $\tau_c$  generations, we  
283 set the next set of demes to be colonized from previously colonized populations, and cycles of  
284 serial colonization proceed until the last of 99 demes is colonized. We set the simulations to then  
285 run for  $\tau$  additional generations after the last colonized deme has reached  $N_K$ . Through the entire  
286 simulation, we allowed colonized demes to exchange individuals with neighboring colonized  
287 demes (4-neighbors) according to a migration parameter ( $m$ ) that reflects the per individual per  
288 generation probability of migration. After all available demes are colonized, we let the

289 simulations continue under a stepping-stone model (Kimura & Weiss 1964) for a number of  
290 generations determined by parameter ( $\tau$ ), which signifies the time after initial expansion has  
291 ended. Table 1 lists all parameters controlling the simulations.

292         The particular effect of each parameter on the ability of the GSSA vector (summarized  
293 with the RI) to locate the expansion source was quantified independently. For that, we kept all  
294 parameters—except the one of interest of interest—fixed across simulations (Table 1). For each  
295 scenario/parameter combination, we ran 1,000 simulations for a total of 48,000 simulations (1  
296 scenario x 4 possible sources x 4 parameters x 3 parameter values x 1,000 simulations). After  
297 each simulation was completed (as defined by  $\tau$ ), we gathered a dataset of 5,000 homologous  
298 biallelic SNPs from one individual from each of the 10 locations that were randomly selected  
299 before the simulations, including the source location. We then used our custom python pipeline  
300 to calculate a GSSA (eqs. [2, 3]) and associated RI (eq. [4]) for each of the 10 sampled locations.  
301 The source of the expansion was identified based on the distribution of magnitudes of the RI  
302 across sampling locations, with the smallest RI value assumed to correspond to the expansion  
303 source. Accuracy was measured as the proportion of simulations that correctly identified the  
304 source. To capture the empirical reality that the actual expansion source may not have been  
305 sampled, we repeated our inferences while excluding the source location from our sample (Fig.  
306 S2). In this latter case, accuracy was measured as the proportion of simulations that correctly  
307 identified the most proximate location to the source location among those sampled (Supp. Fig.  
308 3). In the case of the simulations that include the source, the root mean squared error (RMSE)  
309 was also calculated. Additionally, we visualized the magnitude of change in the RI of each  
310 sampled location as a function of when each location was colonized.

311 As a point of comparison, we also used Peter and Slatkin's (2013) approach to identify  
312 the expansion source on the same simulated datasets. Because Peter and Slatkin's approach make  
313 use of interpolation, which reduces the chances of estimating the precise coordinates of the  
314 simulated source, we scored a prediction as accurate whenever Peter and Slatkin's directionality  
315 index was able to locate the source within the perimeter defined by the 8-neighbor demes around  
316 the actual source.

### 317 **Empirical Application**

318 To illustrate and demonstrate the utility of our approach, we applied it to two taxa of the  
319 holarctic butterfly genus *Lycaeides* that are distributed in western North America (Gompert *et al.*  
320 2014b). These butterfly taxa are host-specialists and relatively poor dispersers, with distributions  
321 that are tightly linked to their host plants (Forister *et al.* 2011; Gompert *et al.* 2014a). Their  
322 respective geographical ranges were likely impacted by Pleistocene climatic events (Thompson  
323 *et al.* 1993; Thompson & Anderson 2000; Pierce *et al.* 2004), which presumably involved range  
324 expansions from refugia since the Last Glacial Maximum (LGM). In particular, we focused on  
325 two high-elevation undescribed taxa (Alpine and Jackson *Lycaeides*; Gompert *et al.* 2014). These  
326 data are well-suited for demonstrating our approach because they have a relatively  
327 well-characterized evolutionary history and spatial distribution (Gompert *et al.* 2006; Nice *et al.*  
328 2013), as well as a thorough, spatially widespread genetic sampling (Gompert *et al.* 2014) in the  
329 western mountains of North America (Alpine *Lycaeides*: 10 localities and 8097 independent  
330 homologous SNPs; Jackson *Lycaeides*: 11 localities and 9074 independent homologous SNPs).

331 To compare our geographic predictions of source locality with the plausible geographic  
332 origin of each taxon's putative range expansion after the LGM, we used ecological niche models  
333 (ENMs), projected onto past climates, as independent hypotheses of colonization history under  
334 the assumption of Grinnellian niche conservatism. Briefly, we generated an ENM for each taxon  
335 in the R package dismo (Hijmans 2012) using a maximum entropy approach (Phillips *et al.*  
336 2006) and 19 interpolated climatic surfaces at 30 arc-seconds resolution that summarize global  
337 patterns of temperature, precipitation, and seasonality (Hijmans 2012). We only included  
338 localities for which genetic data are available (Table 1, Gompert *et al.* 2014) given the pending  
339 taxonomic status of these taxa, which can lead to misidentification issues in available locality  
340 databases. To reduce possible sampling bias, for each taxon we filtered the localities based on a  
341 minimum distance required between localities. The exact distance used for each species was  
342 determined by a variogram approach that establishes the distance over which spatial  
343 autocorrelation in environmental conditions is minimal (Brown *et al.* 2016). In addition, to  
344 maximize the fit of the model and to avoid unnecessary complexity, we tuned our models using  
345 the R package ENMeval (Muscarella *et al.* 2014). The tuning procedure consisted of assessing  
346 optimal model parameters based on jackknife cross-validation of the samples (Radosavljevic &  
347 Anderson 2014; Muscarella *et al.* 2014). We chose a jackknife approach given the small sample  
348 size of the filtered collection points (Galante *et al.* 2018). Model fit was evaluated under different  
349 combinations of model features and regularization multipliers (Table S1) using three sequential  
350 criteria: omission rate, AUC, and model feature class complexity. Tuning results are  
351 summarized in Supp. Table 1. We then hindcasted this ENM to the LGM using climatic CCSM  
352 (Community Climate System Model) estimations derived from the Paleoclimate Modelling

353 Intercomparison Project Phase II (Braconnot *et al.* 2007). Finally, following Knowles and  
354 Alvarado-Serrano (2010), we identified the area(s) of contiguous high predicted suitability (i.e.,  
355 refugial distribution) as potential expansion source(s), using as an arbitrary cut-off the top 10<sup>th</sup>  
356 percentile of the predicted suitability scores. We then contrasted these hypothesized sources with  
357 those inferred by our approach.

## 358 **Results**

### 359 **Simulation experiments**

360 Our simulation study showed that the magnitude of the RI calculated from the elements  
361 of our GSSA vector was highly correlated with i) the distance from the location of the expansion  
362 source, and ii) how long, after the expansion started, a location was colonized (Fig. 3). The  
363 metric was able to accurately identify the geographical source of expansion given that one of the  
364 sampling localities was the source of expansion, or the first location colonized among those  
365 sampled (Fig. S3). Still, the degree of accuracy somewhat depended on the location of the source  
366 deme such that lower accuracy occurred when the source was located in a peripheral area (Fig.  
367 4). Still, incorrect inferences tended to identify sampling localities proximate to the actual  
368 expansion locality, regardless of the location of the expansion source (Fig. 5).

369 By summarizing the GSSA with Harpending's (1994) RI, we were able to correctly  
370 identify the source population up to 70% of the time, with RMSE values that approached zero  
371 (Fig. 6). However, this accuracy declined with larger numbers of colonists ( $f$ ) and time since all  
372 demes have been colonized ( $\tau$ ). Likewise, under an IBD model that arose when enough time had  
373 accrued for the signature of the expansion to have significantly diminished (Fig. 6), our metric

374 was unable to accurately identify the source population. Our approach did strongly outperform  
375 Peter and Slatkin's directionality index ( $\psi$ ) by a margin of up to 60%, except in those  
376 aforementioned cases such as a high number of individuals colonizing demes (Fig. 6).

## 377 **Empirical application**

378 The application of our coupled GSSA-RI approach to the two *Lycaeides* datasets suggests  
379 an expansion spatial dynamics that is well in line with species ranges at the LGM according to  
380 our ENM hindcasts (Fig. 7). For the Alpine *Lycaeides* distributed in northern Rocky mountain  
381 areas, the predicted source coincided with the southernmost samples, which are located in the  
382 largest LGM refugium predicted by the ENM hindcasts (Figure 7A). Although the hindcasted  
383 range at the LGM climate for this species covers a wide area that encompasses all of the sampled  
384 locations, the sampling location predicted by the GSSA coincides with an area of highest  
385 suitability. The RI calculated on the GSSA for Jackson *Lycaeides* samples suggested a source  
386 also within the ENM hindcast (which was more heterogeneous in comparison with Alpine  
387 *Lycaeides* hindcast), and close to one potential refugium (i.e., continuous area of high suitability)  
388 (Fig. 7B).

## 389 **Discussion**

390 We introduce a new summary statistic vector, the geographic spectrum of shared alleles  
391 (GSSA), which makes joint use of geographic and genetic information. We demonstrate that it  
392 can be used to help infer the geographic dynamics of a range expansion. We use Harpending's  
393 (1994) RI calculated on the GSSA elements of each sampled genotype to summarize spatial

394 gradients in the distribution of minor alleles that are indicative of the relative position of each  
395 genotype along an expansion axis. However, we envision the elements of the GSSA vector may  
396 be directly incorporated within a supervised machine learning or ABC inferential framework to  
397 obtain parameter estimates associated with source locality likelihoods, and to test competing  
398 expansion hypotheses (He *et al.* 2017b; Fraimout *et al.* 2017; Schrider & Kern 2018).

399         However, there are some important assumptions to first examine before deployment of  
400 the GSSA. First, as with many other population genomic approaches, it should be used after  
401 population structure is explored (Patterson *et al.* 2006; Frichot & François 2015; Petkova *et al.*  
402 2016). Specifically, the GSSA is applied to groups of samples suggested to derive from single  
403 sources by various other exploratory methods applied cautiously (House & Hahn 2017; Elleouet  
404 & Aitken 2018). For example, as late Pleistocene range expansions and recent species invasions  
405 can both have multiple origins (Miraldo *et al.* 2011; Ruiz-Cooley *et al.* 2013; Cristescu 2015),  
406 care needs to be taken to detect the possibility of admixture from multiple origins *a priori*. In this  
407 case, if exploratory methods suggest a species is heavily structured, with a history of expansions  
408 from more than one refugium, researchers could apply the GSSA to each sub-sample  
409 independently. This may, however, prove a challenging task in certain circumstances because  
410 smaller sample sizes (resulting from splitting up the range) may lead to reduced accuracy.  
411 Difficulties may also arise if more than two sources are close together geographically, multiple  
412 expansions occurred, or if gene flow directions are biased given complex heterogeneous  
413 geography (Branco *et al.* 2018; Lundgren & Ralph 2018). However, one strength of the approach  
414 is that the assumption of panmixia within each sub-sample can be relaxed, as our simulated  
415 conditions contain stepping stone relationships among demes such that some

416 isolation-by-distance relationships within genetic clusters is accommodated, as long as there is a  
417 single source.

418 A second assumption underlying our metric is that a single spatial expansion had actually  
419 occurred within an identifiable timeframe. As demonstrated by our simulations with the reduced  
420 accuracy as the time since all demes have been colonized ( $\tau$ ) increases, eventually reaching the  
421 stationarity conditions of isolation-by-distance, the historical signal of expansion will be erased  
422 over long intervals. It is therefore recommended that spatial expansion be tested before  
423 attempting to infer the geographic dynamics of an expansion (Excoffier 2004; Wegmann *et al.*  
424 2006; Elleouet & Aitken 2018).

425 Key advantages of the GSSA are that no outgroup is required, and that it can be deployed  
426 on sparse datasets that are often collected from a variety of non-model species. Notably,  
427 correlation to the source of expansion was in general robust to different across-population  
428 migration rates ( $m$ ) and deme growth rates—as conditioned by the time allowed for demes to  
429 reach their carrying capacity ( $\tau_c$ ). However, accuracy did somewhat decrease with greater  
430 migration levels, as one would expect. Also expectedly, the accuracy in identifying the source  
431 location was greatly diminished by larger founder sizes ( $f$ ), and the amount of time passed after  
432 colonization ended ( $\tau$ ). In the former case, larger  $f$  will deflate the founder effect, whereas in the  
433 latter case the signal of the founder effect will become erased over time (Nei *et al.* 1975).

434 Regardless of parameter setting, the GSSA approach consistently outperformed the  
435 directionality index of Peter and Slatkin's (2013) in all simulations. While such a finding is not  
436 surprising given that we violated the latter method's assumption of allelic polarity and used  
437 smaller sample sizes than recommended, it highlights the gap filled by our new statistic, which



438 accommodates data typical of non-model organisms. As demonstrated by Peter and Slatkin's  
439 (2013) empirical example, in which they found support for the out-of-Africa hypothesis (Li *et al.*  
440 2008; DeGiorgio *et al.* 2009) using a comprehensive empirical dataset consisting of over half a  
441 million SNPs in more than 1,500 individuals distributed in 55 human populations (Fumagalli *et*  
442 *al.* 2011), their statistic is a powerful tool for model organisms. Ours on the other hand, may be  
443 best suited for smaller datasets. Furthermore, it is important to note that the two metrics are not  
444 precisely inferring the same entity even if the overall objective is to uncover the spatial dynamics  
445 of an expansion. Specifically, the smallest RI of the GSSAs is assumed to be associated with the  
446 sampling location closest to the actual origin (i.e., first colonized location among those sampled).  
447 In contrast, Peter and Slatkin's  $\psi$  aims to infer the actual geographical point of expansion, which  
448 can be located beyond the sampling localities. This methodological difference reflects our goal  
449 of limiting the amount of statistical uncertainty at the expense of decreasing potential inferential  
450 capabilities (i.e., limiting the noise introduced by spatial interpolation). Nevertheless, part of our  
451 simulation study used sampling locations that included the source, thereby making this  
452 comparison between both approaches informative.

453         The utility of our new statistic for non-model organisms is also apparent in the empirical  
454 analysis of *Lycaeides* (Fig. 7). These taxa had 8097 and 9074 independent SNPs (i.e., 1 SNP per  
455 tag for Alpine *Lycaeides* and Jackson *Lycaeides* respectively), from which we randomly selected  
456 a set of 5000 SNPs for consistency with our simulations. Our approach was able to point, as  
457 sources, geographical regions of relatively high predicted suitability according to the ENMs. For  
458 Alpine *Lycaeides*, this included a location at the southern end of the range. In contrast, for  
459 Jackson *Lycaeides*, the lowest RI suggested an area of marginal LGM suitability (albeit close to

460 regions predicted to be suitable; Fig. 7). That being said, because the inferred entity refers to the  
461 sampling location that is closest to the true origin (i.e., first colonized location among those  
462 sampled), a perfect match between the ENMs' prediction and the GSSA inference is not  
463 expected. Together with the simulation data, these analyses demonstrate that under circumstances  
464 of more constrained information and limited sampling relative to those common to model  
465 organisms, our approach may be a useful complement to existing methods to infer the geographic  
466 history underlying range expansions (Ramachandran *et al.* 2005; François *et al.* 2010; Peter &  
467 Slatkin 2013). Our results also highlight how independent lines of evidence can be combined for  
468 more robust demographic inference. In contrast to previous attempts to reciprocally validate  
469 ENMs and genetic data without spatially explicit inference (Alvarado-Serrano & Knowles 2014),  
470 our method allows one to make more explicit comparisons between the hypothesized locations of  
471 refugia derived from ENMs and the inferred range expansion dynamics based on genetics. This  
472 capability is of particular interest when considering the uncertainty associated with hindcasting  
473 using ENMs, as these tools are capable only of generating hypotheses about potential distribution  
474 based on abiotic correlates under the assumption of niche conservatism and analogous  
475 climate—which is likely to overpredict the real former distribution of species (Soberón 2007;  
476 Peterson *et al.* 2010; Alvarado-Serrano & Knowles 2014). By combining these approaches, the  
477 confidence in these estimates increases, giving scientists the ability to refine a set of plausible  
478 historical scenarios under consideration.

## 479 **Potential Pitfalls**

480 To help improve model-based inferences, several aspects of our approach should be taken  
481 into consideration. Besides accurate georeferencing of all samples, the number and spatial  
482 distribution of samples should be carefully considered. As it is true for previous methods  
483 (Ramachandran *et al.* 2005; Peter & Slatkin 2013), inferences based on the GSSA will be most  
484 useful with sampling that maximizes geographical space at the cost of multiple samples per  
485 location. Samples clustered in a particular area, and representing only a small portion of the  
486 distribution of the taxon of interest, would probably carry limited information and lead to biased  
487 estimates. Similarly, our results indicate that precaution should be taken with peripheral localities  
488 as they may carry a smaller signal due to noise introduced by boundary effects . In this regard,  
489 the advantage of allowing only a single individual per locality should help researchers to more  
490 efficiently design their sampling scheme without excessive increases in overall costs, assuming  
491 that accessing most of the range of a species is not prohibitive. Furthermore, larger sampling of  
492 geographic space could potentially better enable the implementation of a spatial interpolation to  
493 identify major colonization routes in more detail (Li & Heap 2011).

494 Like any method using genome-wide SNP data, another relevant consideration is the  
495 potential for confounded inference if the sampled SNPs are impacted from parts of the genome  
496 under strong natural selection (Sokal *et al.* 1989; Lotterhos & Whitlock 2014), even if they are  
497 not linked (Allman & Weissman 2018). For this reason, it would be advisable to test for selective  
498 neutrality *a priori*, and to remove loci potentially under selection. An additional consideration is  
499 that care should be taken to ensure that inference is not confounded by multiple population  
500 histories that involve different sources of expansion. Although use of the GSSA does not  
501 explicitly require clustering individuals into populations *a priori* (Frichot & François 2015;

502 Petkova *et al.* 2016), the conduction of exploratory analyses to obtain some information about  
503 population structure may help identify cases of admixture and more than one source for  
504 expansion.

505 As a stand-alone summary statistic, the GSSA is itself an exploratory tool to be used with  
506 other spatial genomic methods such as EEMS (Petkova *et al.* 2016) , MAPS (Al-Asadi *et al.*  
507 2018), or SpaceMix (Bradburd *et al.* 2016): it can investigate one's data and help formulate  
508 model-based hypotheses about population history (House & Hahn 2017). Ideally, the GSSA  
509 should be incorporated into an inferential model that allows for testing historical hypotheses and  
510 for estimating relevant demographic parameters (He *et al.* 2017a).

## 511 **Future Prospects**

512 Further evaluations are needed to assess whether our approach can also detect multiple  
513 sources of expansion (a bimodal distribution of raggedness indices could potentially suggest two  
514 colonization sources), and if it may allow us to estimate the relative timing of expansions (for  
515 instance, by using the slope of the spatial clines in the raggedness of the GSSAs; Fig. 3).  
516 Additionally, the GSSA might be used more generally to test for spatial expansion in the first  
517 place by using null simulations to determine the significance of spatial clines in the raggedness  
518 of GSSAs (Fig. 3). Specifically, the GSSA shape quantified by Harpending's (1994) RI could be  
519 used to test for expansion in the context of a null distribution expected under an ahistorical  
520 equilibrium between distance and genetic differences (i.e. isolation by distance; IBD). Under the  
521 latter scenario, the allelic similarity is expected to be inversely correlated with distance (Wright  
522 1943), and hence the spatial cline of raggedness indexes should not be significant. On the

523 contrary, under a range expansion this slope is expected to be significantly different from zero.  
524 Finally, the GSSA could also be a useful way to explore a broader set of models such as a  
525 source/sink population scenarios (Martinez-Solano & Gonzalez 2008), cyclical histories of  
526 admixture (Frantz *et al.* 2013; Alvarado-Serrano & Hickerson 2015), or heterogeneous  
527 population densities (Excoffier *et al.* 2008). However, the potential for these future directions  
528 remains speculative at this point and further work is needed to assess these possibilities.

529 Our approach may also be expanded if there is interest in more precisely identifying the  
530 geographic origin of an expansion when the source area is suspected to be missing from the  
531 sample. That would require interpolating the expected raggedness index at un-sampled localities  
532 to identify the region with the smallest indexes. Implementing an interpolation would also allow  
533 us to potentially identify spatially isolated areas of contiguous high raggedness indices, which  
534 could serve to uncover instances of expansion from more than one source using an Euclidean  
535 allocation algorithm. However, as interpolation is strongly impacted by the number and  
536 distribution of observed samples (Stein 2012), its implementation may be not possible when a  
537 limited number of locations are available since interpolation accuracy drastically decreases for  
538 small sample sizes. Alternatively, a time-difference of arrival approach (TDOA; (Gustafsson *et al.*  
539 *al.* 1994)) could be implemented, as done by Peter and Slatkin's (2013)  $\psi$ . Commonly used for  
540 localization, the TDOA is a triangulation approach that takes advantage of the change in the  
541 strength of a signal as distance from the source increases (Gustafsson *et al.* 1994; Drake &  
542 Dogancay 2004). Specifically in our case, the pairwise difference in raggedness index between  
543 location pairs may be used as the signal change for triangulation to identify the geographic  
544 coordinates of the hypothesized source (see eq. 5 in Peter and Slatkin 2013).

545 For those interested in community ecology and species interactions, the GSSA may be  
546 used in aggregated geo-referenced population genomic datasets of co-distributed taxa to test for  
547 concerted spatio-temporal dynamics between two interacting species (Perkins & Swayne 2001;  
548 Wicker *et al.* 2012), the sources of multiple invading species (Sax *et al.* 2007; Johnson *et al.*  
549 2009), and the geographic origins of multiple historic domestications (Kanginakudru *et al.* 2008;  
550 He *et al.* 2011). Likewise, it may be used to help identify shared regions of secondary contact  
551 and hybridization between long-isolated co-distributed pairs of taxa (Remington 1968; Moritz *et*  
552 *al.* 2009), or to understand the assembly of whole communities across geographic barriers or  
553 trajectories of expansion after global shifts in climate (Avisé *et al.* 1987; Ibrahim *et al.* 1996;  
554 Avisé 2000; Hewitt 2000; Burbrink *et al.* 2016). Additionally, if one were interested in  
555 incorporating a resistance surface to correct for effective distances that emerge from landscape  
556 features (Spear *et al.* 2010), the GSSA may easily accommodate alternative distance matrices to  
557 allow the integration of realistic landscape scenarios.

## 558 **Conclusion**

559 The GSSA statistic we present here builds on emerging efforts to make phylogeography  
560 and population genetics more spatially explicit (Alvarado-Serrano & Hickerson 2015; House &  
561 Hahn 2017; Ashander *et al.* 2018; Bradburd *et al.* 2018). By doing so, it improves our ability to  
562 estimate the geographical source region (or closest areas) as well as the general direction of  
563 range expansions. The use of single samples per location, and un-polarized SNPs, makes this  
564 metric well-suited for a wide range of non-model organisms. The GSSA offers not only the  
565 capability to serve as an additional spatially explicit summary of genetic patterns for

566 model-based inference when likelihood-based methods are intractable (Beaumont 2010; Pudlo *et*  
567 *al.* 2015), but, most importantly, presents a tool for guiding the development of spatially-explicit  
568 demographic hypotheses by better accounting for the spatial component of species histories.  
569 Further developments of this statistic, including the refinement of an interpolation procedure for  
570 geographically sparse samples, should lead to easier incorporation of this tool into  
571 simulation-based inferential approaches (Currat *et al.* 2004; Leblois *et al.* 2009; He *et al.* 2017a).  
572 We expect that the incorporation of expansion surfaces will enable more complex scenarios that  
573 include environmental heterogeneity and explicit geographic barriers to be modeled into these  
574 simulation approaches (Ray & Excoffier 2010; Joseph *et al.* 2016). Likewise, we expect clines in  
575 GSSA estimates to be able to help identify relevant spatial features, such as shared contact zones  
576 between populations that have been colonized from different expansion clusters (Swenson 2010),  
577 or consistent geographic barriers that have maintained isolation of populations during expansions  
578 and hence have promoted differentiation (Carstens *et al.* 2005; Potter *et al.* 2017). The GSSA  
579 offers a useful and flexible tool that complements existing methods for improved understanding  
580 of the processes governing population differentiation and spatial patterns of genomic diversity.

## 581 **Software**

582 A program to calculate the GSSA and Harpending's (1944) raggedness index from  
583 geo-referenced genotypes and associated user-defined geographic distances among sampled  
584 locations is available in [https://bitbucket.org/diegofalvarado-s/GSSA\\_v0.0](https://bitbucket.org/diegofalvarado-s/GSSA_v0.0). This software also  
585 contains the pipeline needed to recreate the simulations we used to test the accuracy of the GSSA

586 and Peter and Slatkin's  $\psi$ . A full step-by-step implementation of our method, including  
587 comments and visualization of the intermediate outputs, is available at the following jupyter  
588 notebook: <https://mybinder.org/v2/gh/ftempo/GSSA/master>.

## 589 **Acknowledgements**

590 We would like to thank Benjamin Peter for assistance in the implementation of the  
591 directionality method and Zach Gompert for generously providing the genome-wide  
592 geo-referenced SNP data, as well as Gideon Bradburd, Ana Carnaval, Marcelo Gehara, Isaac  
593 Overcast, and John Robinson for insightful comments on previous versions of this manuscript.  
594 All authors reviewed the manuscript. Funding was provided by grants from FAPESP (BIOTA,  
595 2013/50297-0 to MJH and AC Carnaval), NASA through the Dimensions of Biodiversity  
596 Program (DOB 1343578 to MJH), and the National Science Foundation (DEB-1253710 to  
597 MJH). This work would not have been possible without help from the City University of New  
598 York High Performance Computing Center, with support from the National Science Foundation  
599 (CNS-0855217 and CNS- 0958379).



## 600 References

- 601 Al-Asadi, H., Petkova, D., Stephens, M., & Novembre, J. (2018). Estimating recent migration  
602 and population size surfaces. *bioRxiv*, doi:10.1101/365536.
- 603 Allman, B.E., & Weissman, D.B. (2018). Hitchhiking in space: Ancestry in adapting, spatially  
604 extended populations. *Evolution*, **72**, 722–734.
- 605 Alvarado-Serrano, D.F., & Hickerson, M.J. (2015). Spatially explicit summary statistics for  
606 historical population genetic inference. *Methods in Ecology and Evolution*, **7**, 418–427.
- 607 Alvarado-Serrano, D.F., & Knowles, L.L. (2014). Ecological niche models in phylogeographic  
608 studies: Applications, advances and precautions. *Molecular Ecology Resources*, **14**,  
609 233–248.
- 610 Ashander, J., Ralph, P., McCartney-Melstad, E., & Shaffer, H.B. (2018). Demographic inference  
611 in a spatially-explicit ecological model from genomic data: A proof of concept for the  
612 Mojave Desert Tortoise. *bioRxiv*. doi: 10.1101/354530.
- 613 Avise, J.C. (2000). *Phylogeography: The history and formation of species*. Harvard University  
614 Press. Cambridge.
- 615 Avise, J.C., Arnold, J., Ball, R.M., Bermingham, E., Lamb, T., Neigel, J.A., ..., Saunders, N.C.  
616 (1987). Intraspecific phylogeography: The mitochondrial DNA bridge between population  
617 genetics and systematics. *Annual Review of Ecology and Systematics*, **18**, 489–522.
- 618 Beaumont, M. (2010). Approximate Bayesian computation in evolution and ecology. *Annual*  
619 *Review of Ecology, Evolution, and Systematics*, **41**, 379–406.
- 620 Braconnot, P., Otto-Bliesner, B., Harrison, S., Joussaume, S., Peterchmitt, J.-Y., Abe-Ouchi, A.,  
621 ..., Zhao, Y. (2007). Results of PMIP2 coupled simulations of the Mid-Holocene and Last  
622 Glacial Maximum--Part 1: experiments and large-scale features. *Climate of the Past*, **3**,  
261–277.
- 624 Bradburd, G.S., Coop, G.M., & Ralph, P.L. (2018). Inferring continuous and discrete population  
625 genetic structure across space. *Genetics*, **210**, 33–52.
- 626 Bradburd, G.S., Ralph, P.L., & Coop, G.M. (2016). A spatial framework for understanding  
627 population structure and admixture. *PLoS genetics*, **12**, e1005703.
- 628 Branco, C., Velasco, M., Benguigui, M., Currat, M., Ray, N., & Arenas, M. (2018).  
629 Consequences of diverse evolutionary processes on american genetic gradients of modern  
630 humans. *Heredity*, doi: 10.1038/s41437-018-0122-x.
- 631 Brown, J.L., Weber, J.J., Alvarado-Serrano, D.F., Hickerson, M.J., Franks, S.J., & Carnaval, A.C.

- 632 (2016). Predicting the genetic consequences of future climate change: The power of  
633 coupling spatial demography, the coalescent, and historical landscape changes. *American*  
634 *Journal of Botany*, **103**, 153–163.
- 635 Burbrink, F.T., Chan, Y.L., Myers, E.A., Ruane, S., Smith, B.T., & Hickerson, M.J. (2016).  
636 Asynchronous demographic responses to Pleistocene climate change in Eastern Nearctic  
637 vertebrates. *Ecology Letters*, **19**, 1457–1467.
- 638 Cardozo, A.L.P., Farias, E.G.G., Rodrigues-Filho, J.L., Moteiro, I.B., Scandolo, T.M. & Dantas,  
639 T.V. (2018). Feeding ecology and ingestion of plastic fragments by *Priacanthus arenatus*:  
640 What's the fisheries contribution to the problem? *Marine Pollution Bulletin*, **130**, 19–27.
- 641 Carstens, B.C., Brunsfeld, S.J., Demboski, J.R., Good, J.D., & Sullivan, J. (2005). Investigating  
642 the evolutionary history of the Pacific Northwest mesic forest ecosystem: Hypothesis  
643 testing within a comparative phylogeographic framework. *Evolution*, **59**, 1639–1652.
- 644 Charles H., & Dukes, J.S. (2008). Impacts of invasive species on ecosystem services. In:  
645 *Biological Invasions Ecological Studies*, pp. 217–237. Springer, Heidelberg.
- 646 Cristescu, M.E. (2015). Genetic reconstructions of invasion history. *Molecular Ecology*, **24**,  
647 2212–2225.
- 648 Currat, M., Ray, N., & Excoffier, L. (2004). Splatche: a program to simulate genetic diversity  
649 taking into account environmental heterogeneity. *Molecular Ecology Notes*, **4**, 139–142.
- 650 Davis, C.D., Epps, C.W., Flitcroft, R.L., & Banks, M.A. (2018). Refining and defining riverscape  
651 genetics: How rivers influence population genetic structure. *Wiley Interdisciplinary*  
652 *Reviews: Water*, **5**, e1269.
- 653 DeGiorgio, M., Jakobsson, M., & Rosenberg, N.A. (2009). Explaining worldwide patterns of  
654 human genetic variation using a coalescent-based serial founder model of migration  
655 outward from Africa. *Proceedings of the National Academy of Sciences*, **106**, 16057–16062.
- 656 Drake, S.R., & Dogancay, K. (2004). Geolocation by time difference of arrival using hyperbolic  
657 asymptotes. In: *2004 IEEE International Conference on Acoustics, Speech, and Signal*  
658 *Processing*, pp. 361–364.
- 659 Elleouet, J.S., & Aitken, S.N. (2018). Exploring Approximate Bayesian Computation for  
660 inferring recent demographic history with genomic markers in non-model species.  
661 *Molecular Ecology Resources*, doi: 10.1111/1755-0998.12758.
- 662 Excoffier, L. (2004). Patterns of DNA sequence diversity and genetic structure after a range  
663 expansion: Lessons from the infinite-island model. *Molecular Ecology*, **13**, 853–864.
- 664 Excoffier, L., Dupanloup, I., Huerta-Sánchez, E., Sousa, V.C., & Foll, M. (2013). Robust

- 665 demographic inference from genomic and SNP data. *PLoS genetics*, **9**, e1003905.
- 666 Excoffier, L., & Foll, M. (2011). Fastsimcoal: A continuous-time coalescent simulator of  
667 genomic diversity under arbitrarily complex evolutionary scenarios. *Bioinformatics*, **27**,  
668 1332–1334.
- 669 Excoffier, L., Foll, M., & Petit, R.J. (2008). Genetic consequences of range expansions. *Annual*  
670 *Review of Ecology, Evolution, and Systematics*, **40**, 481–501.
- 671 Excoffier, L., Hofer, T., & Foll, M. (2009). Detecting loci under selection in a hierarchically  
672 structured population. *Heredity*, **103**, 285–298.
- 673 Fagua, J.C., & Gonzalez, V.H. (2007). Growth rates, reproductive phenology, and pollination  
674 ecology of *Espeletia grandiflora* (Asteraceae), a giant Andean caulescent rosette. *Plant*  
675 *Biology*, **9**, 127–135.
- 676 Fordham, D.A., Brook, B.W., Moritz, C., & Nogués-Bravo, D. (2014). Better forecasts of range  
677 dynamics using genetic data. *Trends in Ecology & Evolution*, **29**, 436–443.
- 678 Forister, M.L., Gompert, Z., Fordyce, J.A., & Nice, C.C. (2011). After 60 years, an answer to the  
679 question: What is the Karner blue butterfly? *Biology Letters*, **7**, 399–402.
- 680 Fraimout, A., Debat, V., Fellous, S., Hufbauer, R.A., Foucaud, J., Pudlo, P., ..., Estoup, A.  
681 (2017). Deciphering the routes of invasion of *Drosophila suzukii* by means of ABC Random  
682 Forest. *Molecular Biology and Evolution*, **34**, 980–996.
- 683 François, O., Currat, M., Ray, N., Han, E., Excoffier, L. & Novembre, J. (2010). Principal  
684 component analysis under population genetic models of range expansion and admixture.  
685 *Molecular Biology and Evolution*, **27**, 1257–1268.
- 686 Frantz, L.A.F., Schraiber, J.G., Madsen, O., Megens, H.J., Bosse, M., Paudel, Y., ..., Groenen,  
687 M.A. (2013). Genome sequencing reveals fine scale diversification and reticulation history  
688 during speciation in *Sus*. *Genome Biology*, **14**, R107.
- 689 Frichot, E., & François, O. (2015). LEA: An R package for landscape and ecological association  
690 studies. *Methods in Ecology and Evolution*, **6**, 925–929.
- 691 Fumagalli, M., Sironi, M., Pozzoli, U., Ferrer-Admetlla, A., Pattini, L. & Nielsen, R. (2011).  
692 Signatures of environmental genetic adaptation pinpoint pathogens as the main selective  
693 pressure through human evolution. *PLoS genetics*, **7**, e1002355.
- 694 Galante, P.J., Alade, B., Muscarella, R., Jansa, S.A., Goodman, S.M., & Anderson, R.P. (2018).  
695 The challenge of modeling niches and distributions for data-poor species: a comprehensive  
696 approach to model complexity. *Ecography*, **41**, 726–736.

- 697 Gaston KJ (2003) *The Structure and Dynamics of Geographic Ranges*. Oxford University Press.  
698 Oxford.
- 699 Gompert, Z., Comeault, A.A., Farkas, T.E., Feder, J.L., Parchman, T.L., Buerkle, C.A., & Nosil,  
700 P. (2014a). Experimental evidence for ecological selection on genome variation in the wild.  
701 *Ecology Letters*, **17**, 369–379.
- 702 Gompert, Z., Fordyce, J.A., Forister, M.L., Shapiro, A.M., & Nice, C.C. (2006). Homoploid  
703 hybrid speciation in an extreme habitat. *Science*, **314**, 1923–1925.
- 704 Gompert, Z., Forister, M.I., Fordyce, J.A., Nice, C.C., Williamson, R.J., & Buerkle, C.A. (2010).  
705 Bayesian analysis of molecular variance in pyrosequences quantifies population genetic  
706 structure across the genome of *Lycaeides* butterflies. *Molecular Ecology*, **19**, 2455–2473.
- 707 Gompert, Z., Lucas, L.K., Buerkle, C.A., Forister, M.L., Fordyce, J.A., & Nice, C.C. (2014b).  
708 Admixture and the organization of genetic diversity in a butterfly species complex revealed  
709 through common and rare genetic variants. *Molecular Ecology*, **23**, 4555–4573.
- 710 Gustafsson, F., Gunnarsson, S., & Ljung, L. (1994). On time-frequency resolution of signal  
711 properties using parametric techniques. In: 1994 *Proceedings of 33rd IEEE Conference on*  
712 *Decision and Control*, pp. 2259–2264.
- 713 Gutenkunst, R.N., Hernandez, R.D., Williamson, S.H., Bustamante, C.D. (2009). Inferring the  
714 joint demographic history of multiple populations from multidimensional SNP frequency  
715 data. *PLoS genetics*, **5**, e1000695.
- 716 Hallatschek, O., Hersen, P., Ramanathan, S., & Nelson, D.R. (2007) Genetic drift at expanding  
717 frontiers promotes gene segregation. *Proceedings of the National Academy of Sciences of*  
718 *the United States of America*, **104**, 19926–19930.
- 719 Hallatschek, O., & Nelson DR (2008) Gene surfing in expanding populations. *Theoretical*  
720 *Population Biology*, **73**, 158–170.
- 721 Harpending, H.C. (1994). Signature of ancient population growth in a low-resolution  
722 mitochondrial DNA mismatch distribution. *Human Biology*, **66**, 591–600.
- 723 Henn, B.M., Cavalli-Sforza, L.L., & Feldman, M.W. (2012). The great human expansion.  
724 *Proceedings of the National Academy of Sciences of the United States of America*, **109**,  
725 17758–17764.
- 726 He, Q., Prado, J.R., & Knowles, L.L. (2017). Inferring the geographic origin of a range  
727 expansion: Latitudinal and longitudinal coordinates inferred from genomic data in an ABC  
728 framework with the program x-origin. *Molecular Ecology*, **26**, 6908–6920.
- 729 Hewitt, G. (2000). The genetic legacy of the Quaternary ice ages. *Nature*, **405**, 907–913.

- 730 He, Z., Zhai, W., Wen, H., Tang, T., Wang, Y., Lu, X., . . . , Shi, S. (2011). Two evolutionary  
731 histories in the genome of rice: The roles of domestication genes. *PLoS genetics*, **7**,  
732 e1002100.
- 733 Hijmans, R.J. (2012). Cross-validation of species distribution models: Removing spatial sorting  
734 bias and calibration with a null model. *Ecology*, **93**, 679–688.
- 735 House, G.L., & Hahn, M.W. (2018). Evaluating methods to visualize patterns of genetic  
736 differentiation on a landscape. *Molecular Ecology Resources*, **18**, 448–460.
- 737 Ibrahim, K.M., Nichols, R.A., & Hewitt, G.M. (1996). Spatial patterns of genetic variation  
738 generated by different forms of dispersal during range expansion. *Heredity*, **77**, 282–291.
- 739 Johnson, P.T.J., Olden, J.D., Solomon, C.T., Vander Zanden, M.J. (2009). Interactions among  
740 invaders: Community and ecosystem effects of multiple invasive species in an experimental  
741 aquatic system. *Oecologia*, **159**, 161–170.
- 742 Jones, E., Oliphant, T., & Peterson, P. (2001). SciPy: Open source scientific tools for Python,  
743 **doi:** 10.1234/12345678.
- 744 Joseph, T.A., Hickerson, M.J., & Alvarado-Serrano, D.F. (2016). Demographic inference under a  
745 spatially continuous coalescent model. *Heredity*, **117**, 94–99.
- 746 Kanginakudru, S., Metta, M., Jakati, R.D., & Nagaraju, J. (2008). Genetic evidence from Indian  
747 red jungle fowl corroborates multiple domestication of modern day chicken. *BMC*  
748 *Evolutionary Biology*, **8**, 174.
- 749 Kimura, M., & Weiss, G.H. (1964). The stepping stone model of population structure and the  
750 decrease of genetic correlation with distance. *Genetics*, **49**, 561–576.
- 751 Kirkpatrick M., & Barton, N.H. (1997). Evolution of a species' range. *The American naturalist*,  
752 **150**, 1–23.
- 753 Knowles, L.L., & Alvarado-Serrano, D.F. (2010). Exploring the population genetic consequences  
754 of the colonization process with spatio-temporally explicit models: Insights from coupled  
755 ecological, demographic and genetic models in montane grasshoppers. *Molecular Ecology*,  
**19**, 3727–3745.
- 757 Konečný, A., Estoup, A., Duplantier, J.-M., Bryja, J., Ba, K., Galan, M., . . . , Cosson, J.F. (2013).  
758 Invasion genetics of the introduced black rat (*Rattus rattus*) in Senegal, West Africa.  
759 *Molecular Ecology*, **22**, 286–300.
- 760 Leblois, R., Estoup, A., Rousset, F. (2009). IBDSim: A computer program to simulate genotypic  
761 data under isolation by distance. *Molecular Ecology Resources*, **9**, 107–109.

- 762 Legendre P., & Legendre, L.F.J. (2012). *Numerical Ecology*. Elsevier. Philadelphia.
- 763 Li, J.Z., Absher, D.M., Tang, H., Southwick, A.M., Casto, A.M., Ramachandran, S., ..., Myers,  
764 R.M. (2008). Worldwide human relationships inferred from genome-wide patterns of  
765 variation. *Science*, **319**, 1100–1104.
- 766 Li J., & Heap, A.D. (2011). A review of comparative studies of spatial interpolation methods in  
767 environmental sciences: Performance and impact factors. *Ecological Informatics*, **6**,  
768 228–241.
- 769 Lotterhos, K.E., & Whitlock, M.C. (2014). Evaluation of demographic history and neutral  
770 parameterization on the performance of  $F_{ST}$  outlier tests. *Molecular Ecology*, **23**,  
771 2178–2192.
- 772 Lundgren, E., & Ralph, P.L. (2018). Are populations like a circuit? The relationship between  
773 isolation by distance and isolation by resistance. *bioRxiv*, doi: 10.1101/451328.
- 774 Martinez-Solano, I., Gonzalez, E.G. (2008). Patterns of gene flow and source-sink dynamics in  
775 high altitude populations of the common toad *Bufo bufo* (Anura: Bufonidae). *Biological*  
776 *Journal of the Linnean Society*, **95**, 824–839.
- 777 Menozzi, P., Piazza, A., & Cavalli-Sforza, L. (1978). Synthetic maps of human gene frequencies  
778 in Europeans. *Science*, **201**, 786–792.
- 779 Miraldo, A., Hewitt, G.M., Paulo, O.S., & Emerson, B.C. (2011). Phylogeography and  
780 demographic history of *Lacerta lepida* in the Iberian Peninsula: Multiple refugia, range  
781 expansions and secondary contact zones. *BMC Evolutionary Biology*, **11**, 170.
- 782 Moritz, C., Hoskin, C.J., MacKenzie, J.B., Phillips, B.L., Tonione, M., Silva, N., ..., Graham,  
783 C.H. (2009). Identification and dynamics of a cryptic suture zone in tropical rainforest.  
784 *Proceedings of the Royal Society B: Biological Sciences*, **276**, 1235–1244.
- 785 Muscarella, R., Galante, P.J., Soley-Guardia, M., Boria, R.A., Kass, J.M., Uriarte, M., &  
786 Anderson, R.P. (2014). ENMeval: An R package for conducting spatially independent  
787 evaluations and estimating optimal model complexity for Maxent ecological niche models.  
*Methods in Ecology and Evolution*, **5**, 1198–1205.
- 789 Nei, M., Maruyama, T., & Chakraborty, R. (1975). The bottleneck effect and genetic variability  
790 in populations. *Evolution*, **29**, 1–10.
- 791 Nice, C.C., Gompert, Z., Fordyce, J.A., Forister, M.L., Lucas, L.K., & Buerkle, C.A. (2013).  
792 Hybrid speciation and independent evolution in lineages of alpine butterflies. *Evolution*, **67**,  
793 1055–1068.



- 794 Novembre, J., & Stephens, M. (2008). Interpreting principal component analyses of spatial  
795 population genetic variation. *Nature Genetics*, **40**, 646–649.
- 796 Patterson, N., Price, A.L., & Reich, D. (2006). Population structure and eigenanalysis. *PLoS*  
797 *Genetics*, **2**, e190.
- 798 Peischl, S., Dupanloup, I., Kirkpatrick, M., & Excoffier, L. (2013). On the accumulation of  
799 deleterious mutations during range expansions. *Molecular Ecology*, **22**, 5972–5982.
- 800 Pemberton, T.J., DeGiorgio, M., & Rosenberg, N.A. (2013). Population structure in a  
801 comprehensive genomic data set on human microsatellite variation. *G3: Genes, Genomes,*  
802 *Genetics*, **3**, 891–907.
- 803 Perkins, L.E., & Swayne, D.E. (2001). Pathobiology of A/chicken/Hong Kong/220/97 (H5N1)  
804 avian influenza virus in seven gallinaceous species. *Veterinary Pathology*, **38**, 149–164.
- 805 Peter, B.M., & Slatkin, M. (2013). Detecting range expansions from genetic data. *Evolution*, **67**,  
806 3274–3289.
- 807 Peter, B.M., & Slatkin, M. (2015). The effective founder effect in a spatially expanding  
808 population. *Evolution*, **69**, 721–734.
- 809 Peterson, K.R., Pfister, D.H., & Bell, C.D. (2010). Cophylogeny and biogeography of the fungal  
810 parasite *Cyttaria* and its host *Nothofagus*, southern beech. *Mycologia*, **102**, 1417–1425.
- 811 Petkova, D., Novembre, J., & Stephens, M. (2016). Visualizing spatial population structure with  
812 estimated effective migration surfaces. *Nature Genetics*, **48**, 94–100.
- 813 Pharo, E.J., & Zartman, C.E. (2007). Bryophytes in a changing landscape: The hierarchical  
814 effects of habitat fragmentation on ecological and evolutionary processes. *Biological*  
815 *Conservation*, **135**, 315–325.
- 816 Phillips, S.J., Anderson, R.P., & Schapire, R.E., (2006). Maximum entropy modeling of species  
817 geographic distributions. *Ecological Modelling*, **190**, 231–259.
- 818 Phillips, B.L., Kelehear, C., Pizzatto, L., Brown, G.P., Barton, D., & Shine, R. (2010). Parasites  
819 and pathogens lag behind their host during periods of host range advance. *Ecology*, **91**,  
820 872–881.
- 821 Pierce, J.L., Meyer, G.A., & Jull, A.J.T. (2004). Fire-induced erosion and millennial-scale  
822 climate change in northern ponderosa pine forests. *Nature*, **432**, 87–90.
- 823 Pires, T.H.S., Farago, T.B., Campos, D.F., Cardoso, G.M., & Zuanon, J. (2016). Traits of a  
824 lineage with extraordinary geographical range: Ecology, behavior and life-history of the  
825 sailfin tetra *Crenuchus spilurus*. *Environmental Biology of Fishes*, **99**, 925–937.

- 826 Potter, S., Xue, A.T., Bragg, J.G., Rosauer, D.F., Roycroft, E.J., & Moritz, C. (2017).  
827 Pleistocene climatic changes drive diversification across a tropical savanna. *Molecular*  
828 *Ecology*, **27**, 520–532.
- 829 Pudlo, P., Marin, J.-M., Estoup, A., Cornuet, J.-M., Gautier, & M., Robert, C.P. (2015). Reliable  
830 ABC model choice via random forests. *Bioinformatics* **32**, 859-866.
- 831 Radosavljevic, A., & Anderson, R.P. (2014) Making better Maxent models of species  
832 distributions: complexity, overfitting and evaluation. *Journal of Biogeography*, **41**,  
833 629–643.
- 834 Ramachandran, S., Deshpande, O., Roseman, C.C., Rosenberg, N.A., Feldman, M.W.,  
835 Cavalli-Sforza, L. (2005). Support from the relationship of genetic and geographic distance  
836 in human populations for a serial founder effect originating in Africa. *Proceedings of the*  
*National Academy of Sciences of the United States of America*, **102**, 15942–15947.
- 838 Ramírez-García, P., López-Blanco J., & Ocaña, D. (1998). Mangrove vegetation assessment in  
839 the Santiago River Mouth, Mexico, by means of supervised classification using LandsatTM  
840 imagery. *Forest Ecology and Management*, **105**, 217–229.
- 841 Ray, N., & Excoffier, L. (2010). A first step towards inferring levels of long-distance dispersal  
842 during past expansions. *Molecular Ecology Resources*, **10**, 902–914.
- 843 Remington, C.L. (1968). Suture-zones of hybrid interaction between recently joined biotas. In:  
844 *Evolutionary Biology*, pp. 321–428. Springer, Boston.
- 845 Roberts, D.R., & Hamann, A. (2015). Glacial refugia and modern genetic diversity of 22 western  
846 North American tree species. *Proceedings of the Royal Society B: Biological Sciences*, **282**,  
847 20142903.
- 848 Ruiz-Cooley, R.I., Ballance, L.T., & McCarthy, M.D. (2013). Range expansion of the jumbo  
849 squid in the NE Pacific:  $\delta^{15}\text{N}$  decrypts multiple origins, migration and habitat use. *PLoS*  
850 *one*, **8**, e59651.
- 851 Sax, D.F., Stachowicz, J.J., Brown, J.H., Bruno, J.F., Dawson, M.N, Gaines, S.D., ..., Rice, W.R.  
852 (2007). Ecological and evolutionary insights from species invasions. *Trends in Ecology &*  
853 *Evolution*, **22**, 465–471.
- 854 Schrider, D.R., & Kern, A.D. (2018). Supervised machine learning for population genetics: A  
855 new paradigm. *Trends in Genetics*, **34**, 301-312.
- 856 Scott, D.W. (1979). On optimal and data-based histograms. *Biometrika*, **66**, 605–610.
- 857 Shirk, A.J., & Cushman, S.A. (2014). Spatially-explicit estimation of Wright’s neighborhood size



- 858 in continuous populations. *Frontiers in Ecology and Evolution*, **2**, 177.
- 859 Slatkin, M. (1987) Gene flow and the geographic structure of natural populations. *Science*, **236**,  
860 787–792.
- 861 Slatkin, M., & Excoffier, L. (2012). Serial founder effects during range expansion: A spatial  
862 analog of genetic drift. *Genetics*, **191**, 171–181.
- 863 Smouse, P.E., & Peakall, R. (1999). Spatial autocorrelation analysis of individual multiallele and  
864 multilocus genetic structure. *Heredity*, **82**, 561–573.
- 865 Soberón, J. (2007) Grinnellian and Eltonian niches and geographic distributions of species.  
866 *Ecology Letters*, **10**, 1115–1123.
- 867 Sokal, R.R., Harding, R.M., & Oden, N.L. (1989). Spatial patterns of human gene frequencies in  
868 Europe. *American Journal of Physical Anthropology*, **80**, 267–294.
- 869 Spear, S.F., Balkenhol, N., Fortin, M.-J., McRae, B.H., & Scribner, K. (2010). Use of resistance  
870 surfaces for landscape genetic studies: considerations for parameterization and analysis.  
871 *Molecular Ecology*, **19**, 3576–3591.
- 872 Stein, M.L. (2012). *Interpolation of Spatial Data: Some Theory for Kriging*. Springer. New York.
- 873 Sturges, H.A. (1926). The choice of a class interval. *Journal of the American Statistical*  
874 *Association*, **21**, 65–66.
- 875 Swenson, N.G. (2010). Mapping the suturing of a continental biota. *Molecular Ecology*, **19**,  
876 5324–5327.
- 877 Thompson, R.S., & Anderson, K.H. (2000). Biomes of western North America at 18,000, 6000  
878 and 0 14C yr bp reconstructed from pollen and packrat midden data. *Journal of*  
879 *Biogeography*, **27**, 555–584.
- 880 Thompson, L.G., Mosley-Thompson, E., Davis, M. Lin, P.N., Yao, T., Dyurgerov, M., & Dai, J.  
881 (1993). “Recent warming”: ice core evidence from tropical ice cores with emphasis on  
882 Central Asia. *Global and Planetary Change*, **7**, 145–156.
- 883 Thuiller, W., Albert, C., Araújo, M.B., Berry, P.M., Cabeza, M., Guisan, A., ..., Zimmermann, E.  
884 (2008). Predicting global change impacts on plant species’ distributions: future challenges.  
885 *Perspectives in Plant Ecology, Evolution and Systematics*, **9**, 137–152.
- 886 Wegmann, D., Currat, M., & Excoffier, L. (2006). Molecular diversity after a range expansion in  
887 heterogeneous environments. *Genetics*, **174**, 2009–2020.
- 888 Wicker, E., Lefeuvre, P., de Cambiaire, J.-C., Lemaire, C., Poussier, S., & Prior, P. (2012).

889           Contrasting recombination patterns and demographic histories of the plant pathogen  
890           *Ralstonia solanacearum* inferred from MLSA. *The ISME Journal*, **6**, 961–974.

891   Wright, S. (1943). Isolation by distance. *Genetics*, **28**, 114–138.

## 892   **Data Accessibility**

893   The whole pipeline and associated files needed to recreate the simulations used is available at the  
894   following bitbucket repository: [https://bitbucket.org/diegofalvarado-s/GSSA\\_v0.0](https://bitbucket.org/diegofalvarado-s/GSSA_v0.0)

## 895   **Author Contributions**

896           DFA and MJH conceived the GSSA statistic and DFA led the development of it. DFA coded  
897   the simulations, analyses and produced the figures. DFA and MJH wrote the manuscript.

898 **Tables**

899 **Table 1.** Parameters used in simulations. Parameter values in bold were used for all simulation  
900 experiments except those in which the parameter is being tested.

| Parameter | Description                                                                                                      | Values tested                  | Unit                 |
|-----------|------------------------------------------------------------------------------------------------------------------|--------------------------------|----------------------|
| $\tau$    | Time allowed for the simulation to continue after last deme has been colonized and reached its carrying capacity | <b>0.0</b><br>0.5<br>1.0       | Coalescent units     |
| $f$       | Proportion of individuals of a source deme that settle each uncolonized deme                                     | <b>0.002</b><br>0.01<br>0.1    | Proportion of $N_K$  |
| $\tau_r$  | Time allowed for demes to reach $N_K$ after being colonized                                                      | <b>0.01</b><br>0.05<br>0.10    | Coalescent units     |
| $m$       | Pairwise probability of migration per individual per generation between neighboring colonized demes              | <b>0.000</b><br>0.001<br>0.010 | Proportion           |
| $N_K$     | Effective population size of deme at carrying capacity                                                           | <b>1000</b>                    | Number of individual |
| $\tau_c$  | Time lag between source deme reaching $N_K$ and colonizing a new deme                                            | <b>0.01</b>                    | Coalescent units     |

## 901 Figure Legends

902 **Fig. 1.** Schematic cartoon describing the construction of the geographic spectrum of shared  
903 alleles (GSSA) across five diploid genotypes that are each sampled from a unique location.  
904 Location-specific genotype matrices ( $G_i$ ), which capture the presence/absence of minor alleles at  
905 each location, locus and DNA strand (**panel a**), and cartoon representation of location-specific  
906 vectors ( $\vec{d}_i$ ), which capture the geographic distances between each focal location and all of the  
907 other locations in the sample (**panel b**). Based on the  $G_i$  matrices and  $\vec{d}_i$  distance vectors,  
908 corresponding vectors ( $\vec{S}_i$ ) are constructed from the aggregated relative spatial distribution of  
909 minor alleles for each location (**panel c**). To facilitate interpretation, the color of each  $\vec{S}_i$  element  
910 follows the location colors in panel a, and indicates their derivation with respect to each one of  
911 the sampled locations. The  $\vec{S}_i$  vectors are then converted into corresponding geo-genetic  
912 histograms ( $h_{gen_i}$ ), by applying a common binning scheme based on Sturge's (1926) equation  
913 (**panel d**). For each location, a corresponding geographic histogram ( $h_{geo_i}$ ) is constructed, using  
914 the same binning scheme as before, from the geographic-distances separating the location from  
915 all other sampled locations (**panel e**). The number of observations for corresponding distance  
916 classes in both histograms,  $h_{gen_i}$  and  $h_{geo_i}$ , are then regressed against each other for each  
917 location (**panel f**). From these regressions, the GSSA vector for each individual is built by taking  
918 the absolute value of the regression residuals for each histogram's distance class (**panel g**).

919 **Fig. 2.** Schematic of the sequential range expansion models used to quantify the spatial  
920 association of the GSSA and expansion source location. Each panel correspond to simulations  
921 started from a different source (marked in red and denoted by letter). Demes are shaded  
922 according to their colonization time, with darker colors corresponding to earlier colonization  
923 times. Sampled demes are surrounded by a square.

924 **Fig. 3.** Association between time at which each sampled locality is colonized and the raggedness  
925 index calculated from the GSSA at each of these localities under all four simulated scenarios.  
926 Colonization time step denotes the time at which a locality was colonized (with the origin always  
927 being zero). The impact of each parameter on the ability to recover the simulated colonization  
928 history is evidenced by changes in the slope of the association. Different colors are used for each  
929 parameter value for increased visibility.

930 **Fig. 4.** Probability across 1000 simulation replicates of the the raggedness index calculated from  
931 the GSSA vector for identifying the source deme given the four serial range expansion scenarios  
932 and model parameter values. Higher probabilities of correct source identifications are a function  
933 of darker shadings. See Table 1 for model parameter definitions.

934 **Fig. 5.** Geographic position of the suggested sources of expansion according to the raggedness  
935 index calculated from the GSSA vector (left column) and directionality index (right column). A  
936 red circle denotes the true source used for each simulation scenario, whereas black circles  
937 indicate the locations sampled (shown only for the GSI-RI approach). Results presented are

938 aggregated across 1000 simulations, with the relative frequency that each position was identified  
939 as the source of expansion indicated by the color hue (darker colors corresponding to greater  
940 frequencies). Note that in the vast majority of instances, the GSSA-RI approach either correctly  
941 infers the source or identifies a close neighbor location.

942 **Fig. 6.** Comparative accuracies of the raggedness index calculated from the GSSA and  
943 directionality index in identifying the source deme for serial range expansions. The mean  
944 accuracy (a) per model parameter tested and corresponding root mean square error (RMSE) (b)  
945 obtained under both methods (GSSA-RI in blue, directionality index in red) is shown under  
946 different model parameter values.

947 **Fig. 7.** Comparison of LGM hindcasts of range distributions obtained with Ecological Niche  
948 Models (ENMs). The grey circles indicate the sampling localities on which the inferences are  
949 based. The suggested sources of expansion according to the GSSA-RI approach are indicated by  
950 a green rhombus with a “G” on it. Warmer colors indicate greater potential suitability as  
951 estimated by the ENM. a) Model and inferences for Alpine *Lycaeides*; b) model and inference  
952 for Jackson *Lycaeides*. Refugia, identified as the top 10th percentile most suitable areas, are  
953 denoted by black polygons.

- 954 **Supp. Table 1.** Tuning results for ecological niche models of *Lycaeides* taxa based on jackknife  
955 cross-validation. Abbreviations: AUC: area-under the ROC curve; OR.10: 10<sup>th</sup> percentile  
956 of omission rate; AICc: corrected Akaike Information Criterion; L: linear features, Q: quadratic  
957 features, LQ: linear-quadratic features; H: hinge features. Models for each species are ordered  
958 according to their ranking, with the best model on top.
- 959 **Supp. Fig. 1.** Estimation accuracy of the raggedness index calculated from the GSSA vector  
960 under alternative histogram binning schemes. Accuracy of the GSSA-based inference when  
961 constructed using Sturge's binning equation is compared against its accuracy when constructed  
962 using a coarser (a), or a finer-grain binning scheme (b). Each dot corresponds to the mean  
963 accuracy with which the source of expansion is inferred for each parameter combination and  
964 binning scheme used (points are colored according to the parameters used in the simulations; see  
965 Table 1). The dashed red line corresponds to a 1:1 line.
- 966 **Supp. Fig. 2.** Example of GSSA vectors for (a) last-colonized and (b) the expansion source  
967 locality in one of the simulations. The frequency of each of the GSSA bin ( $b_k$ ) is depicted along  
968 the corresponding raggedness index (Simulation parameters used:  $\tau = 0$ ;  $f = 0.002$ ;  $\tau_r = 0.01$ ;  $m =$   
969  $0$ ;  $N_K = 1000$ ;  $\tau_c = 0.01$ ; simulated source = "origin B").
- 970 **Supp. Fig. 3.** Geographic position of the sampled locality closest to the source of expansion  
971 according to the GSSA-RI approach. A red circle denotes the locality, among those sampled  
972 (indicated with black incircles), that was first colonized (note the simulated source itself, denoted  
973 by a black square, is not sampled). Results presented are aggregated across simulations, with the  
974 relative frequency that each position was identified as the first to be colonized indicated by the  
975 color hue (darker colors corresponding to greater frequencies). Note that in the vast majority of  
976 instances, the GSSA-RI approach correctly infers the closest neighbor to the source or another  
977 closeby neighbor location.



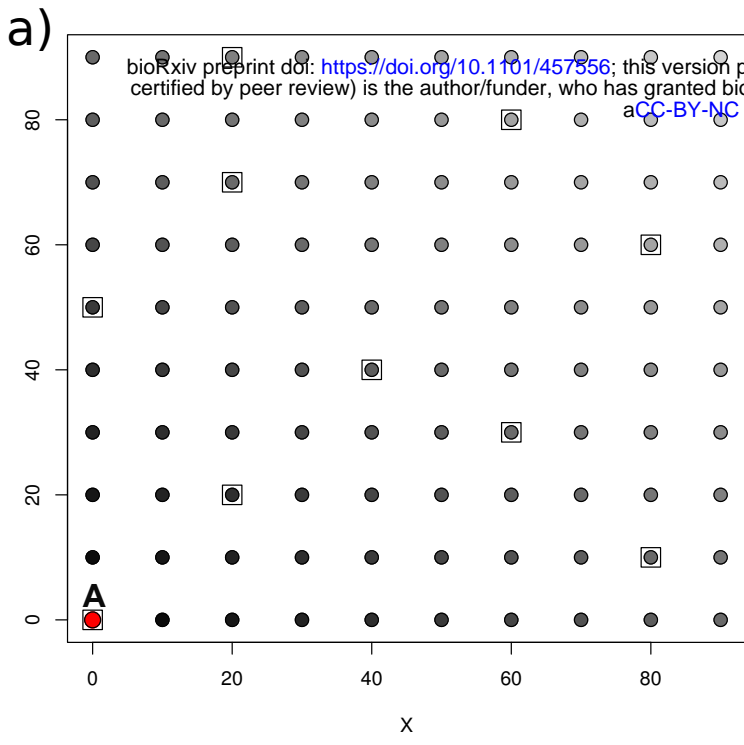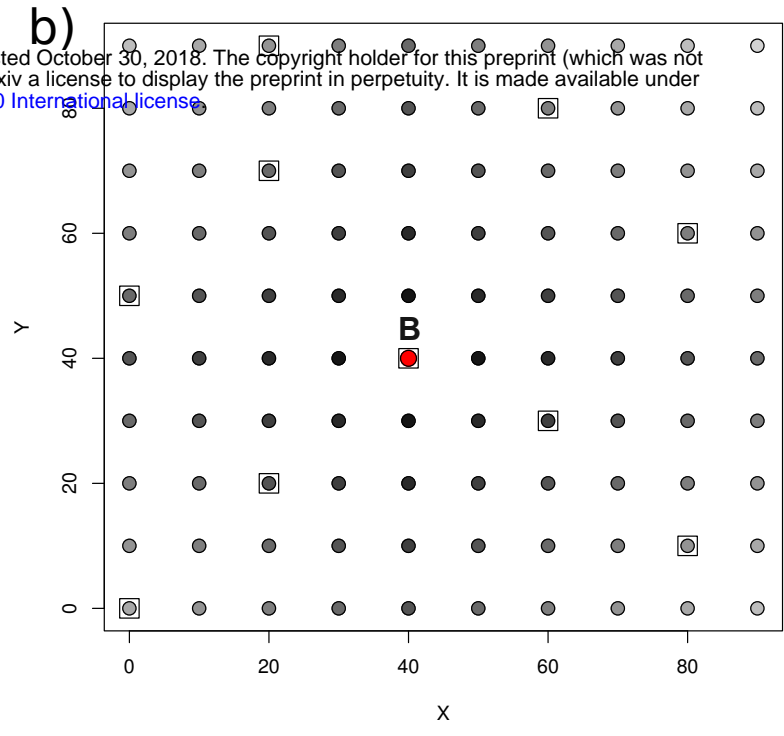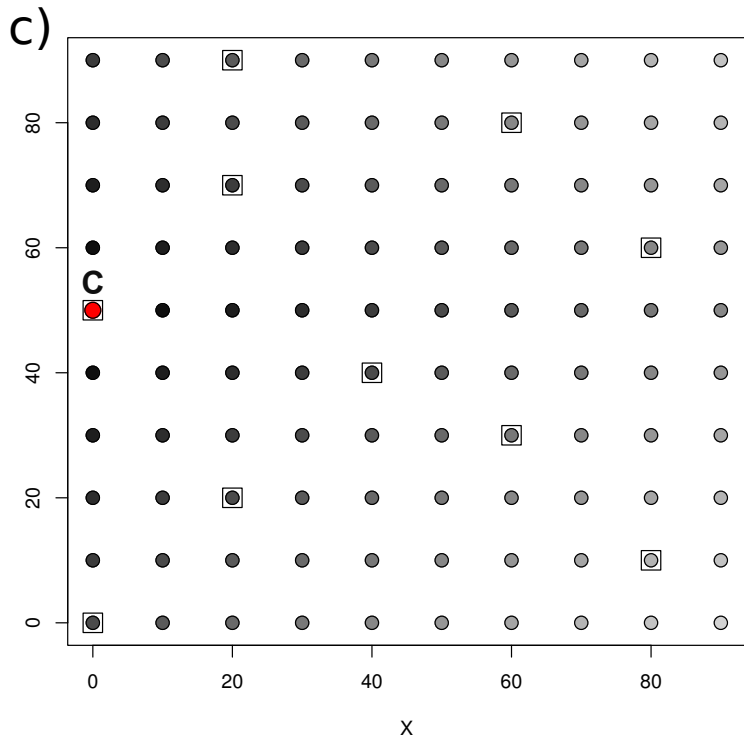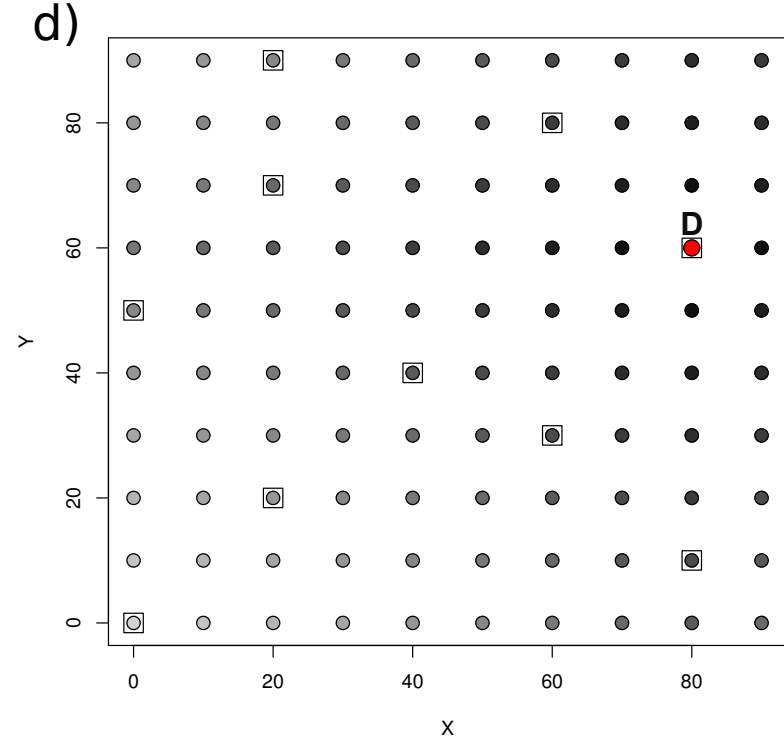

Fig. 2



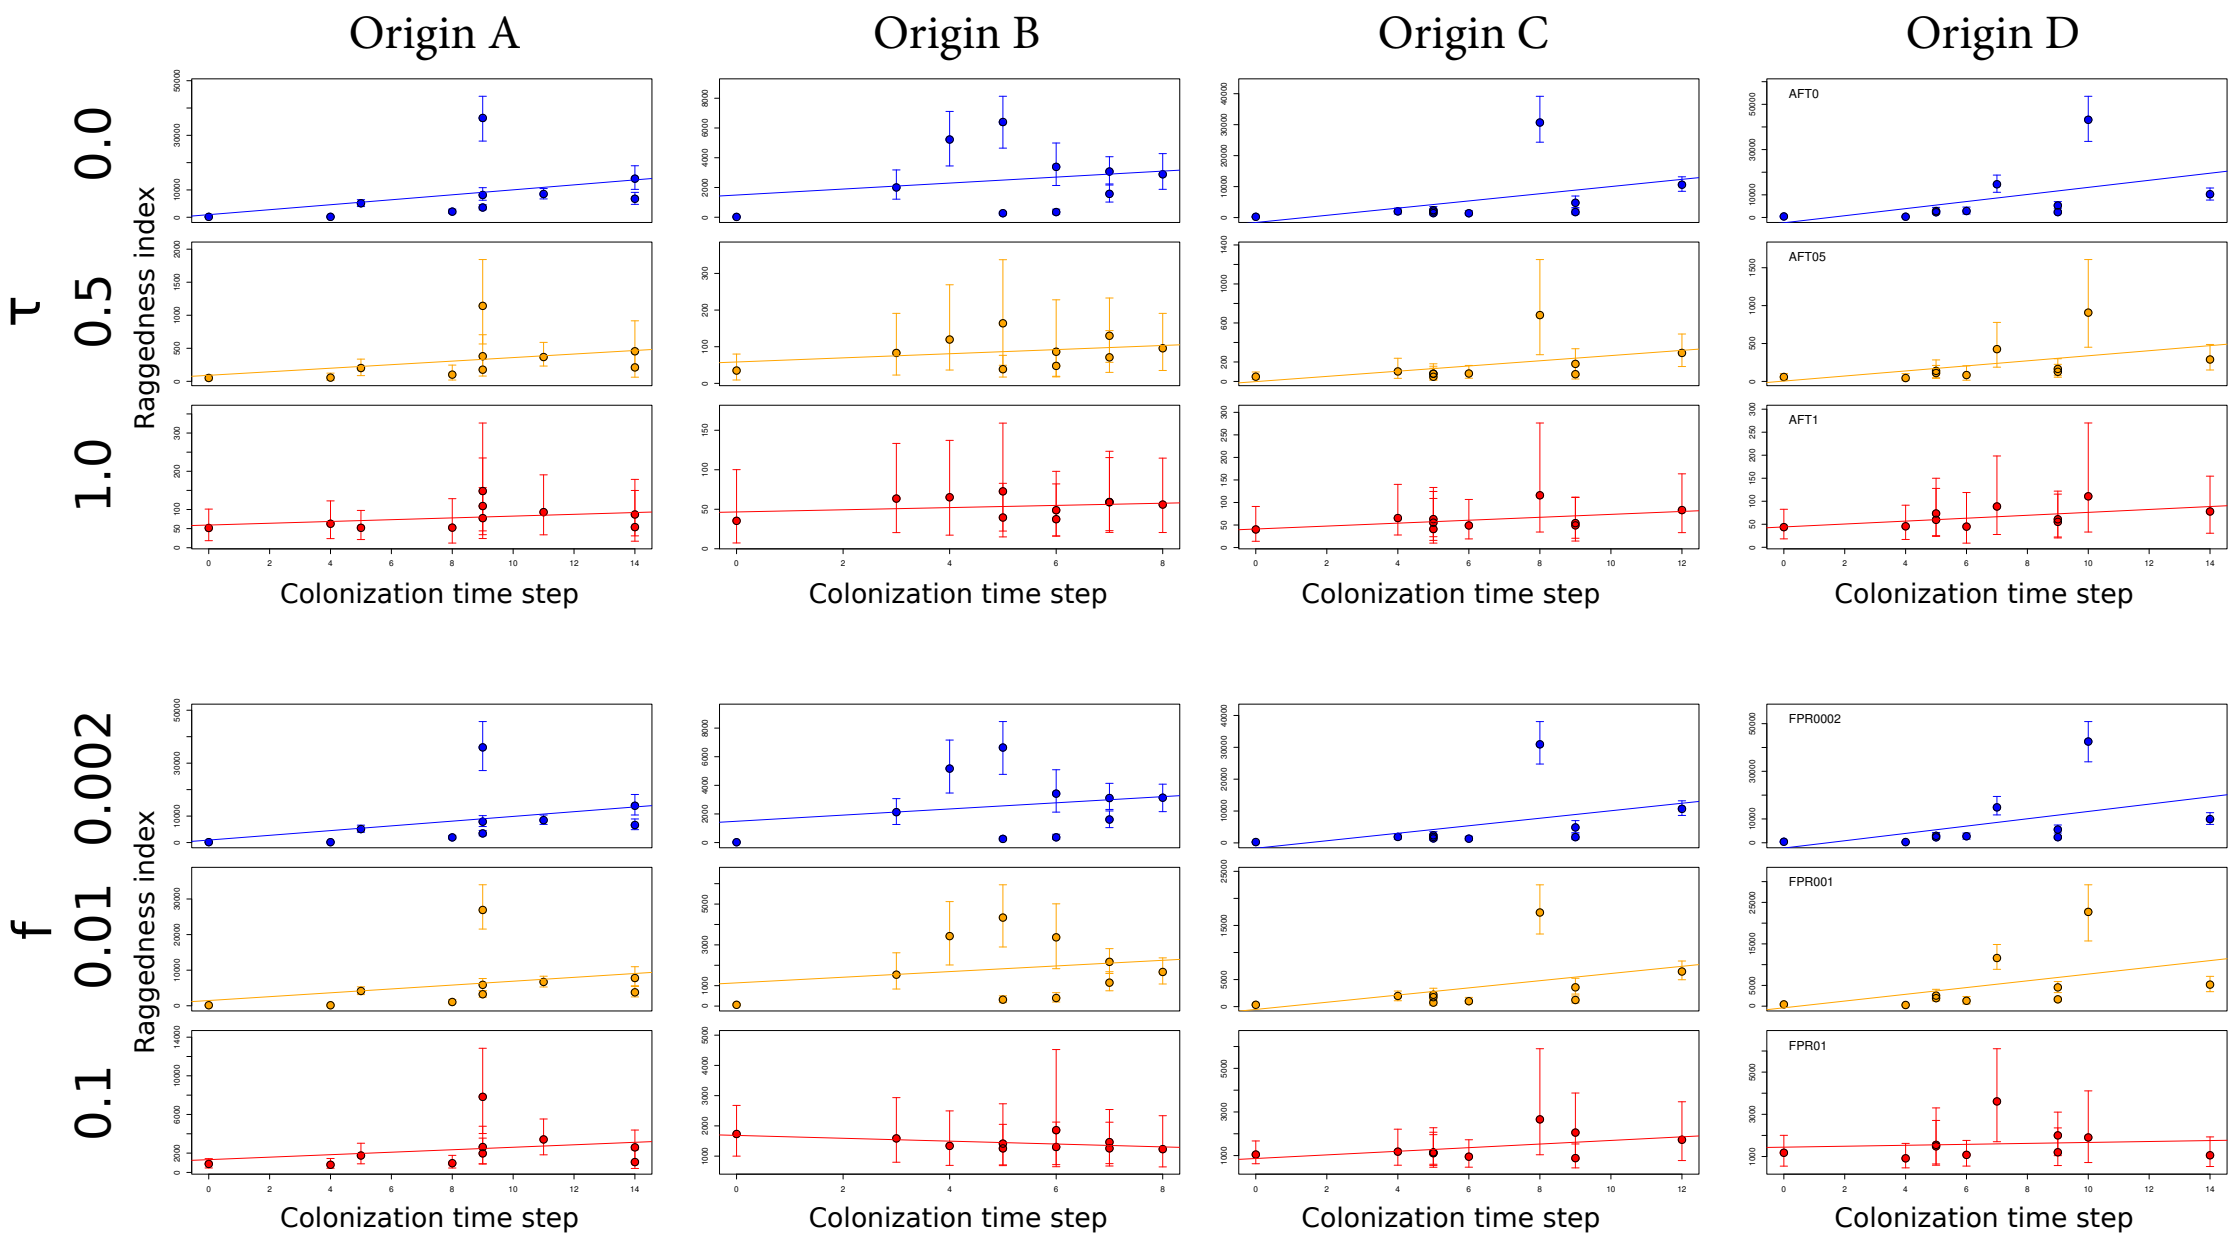

Fig. 3a

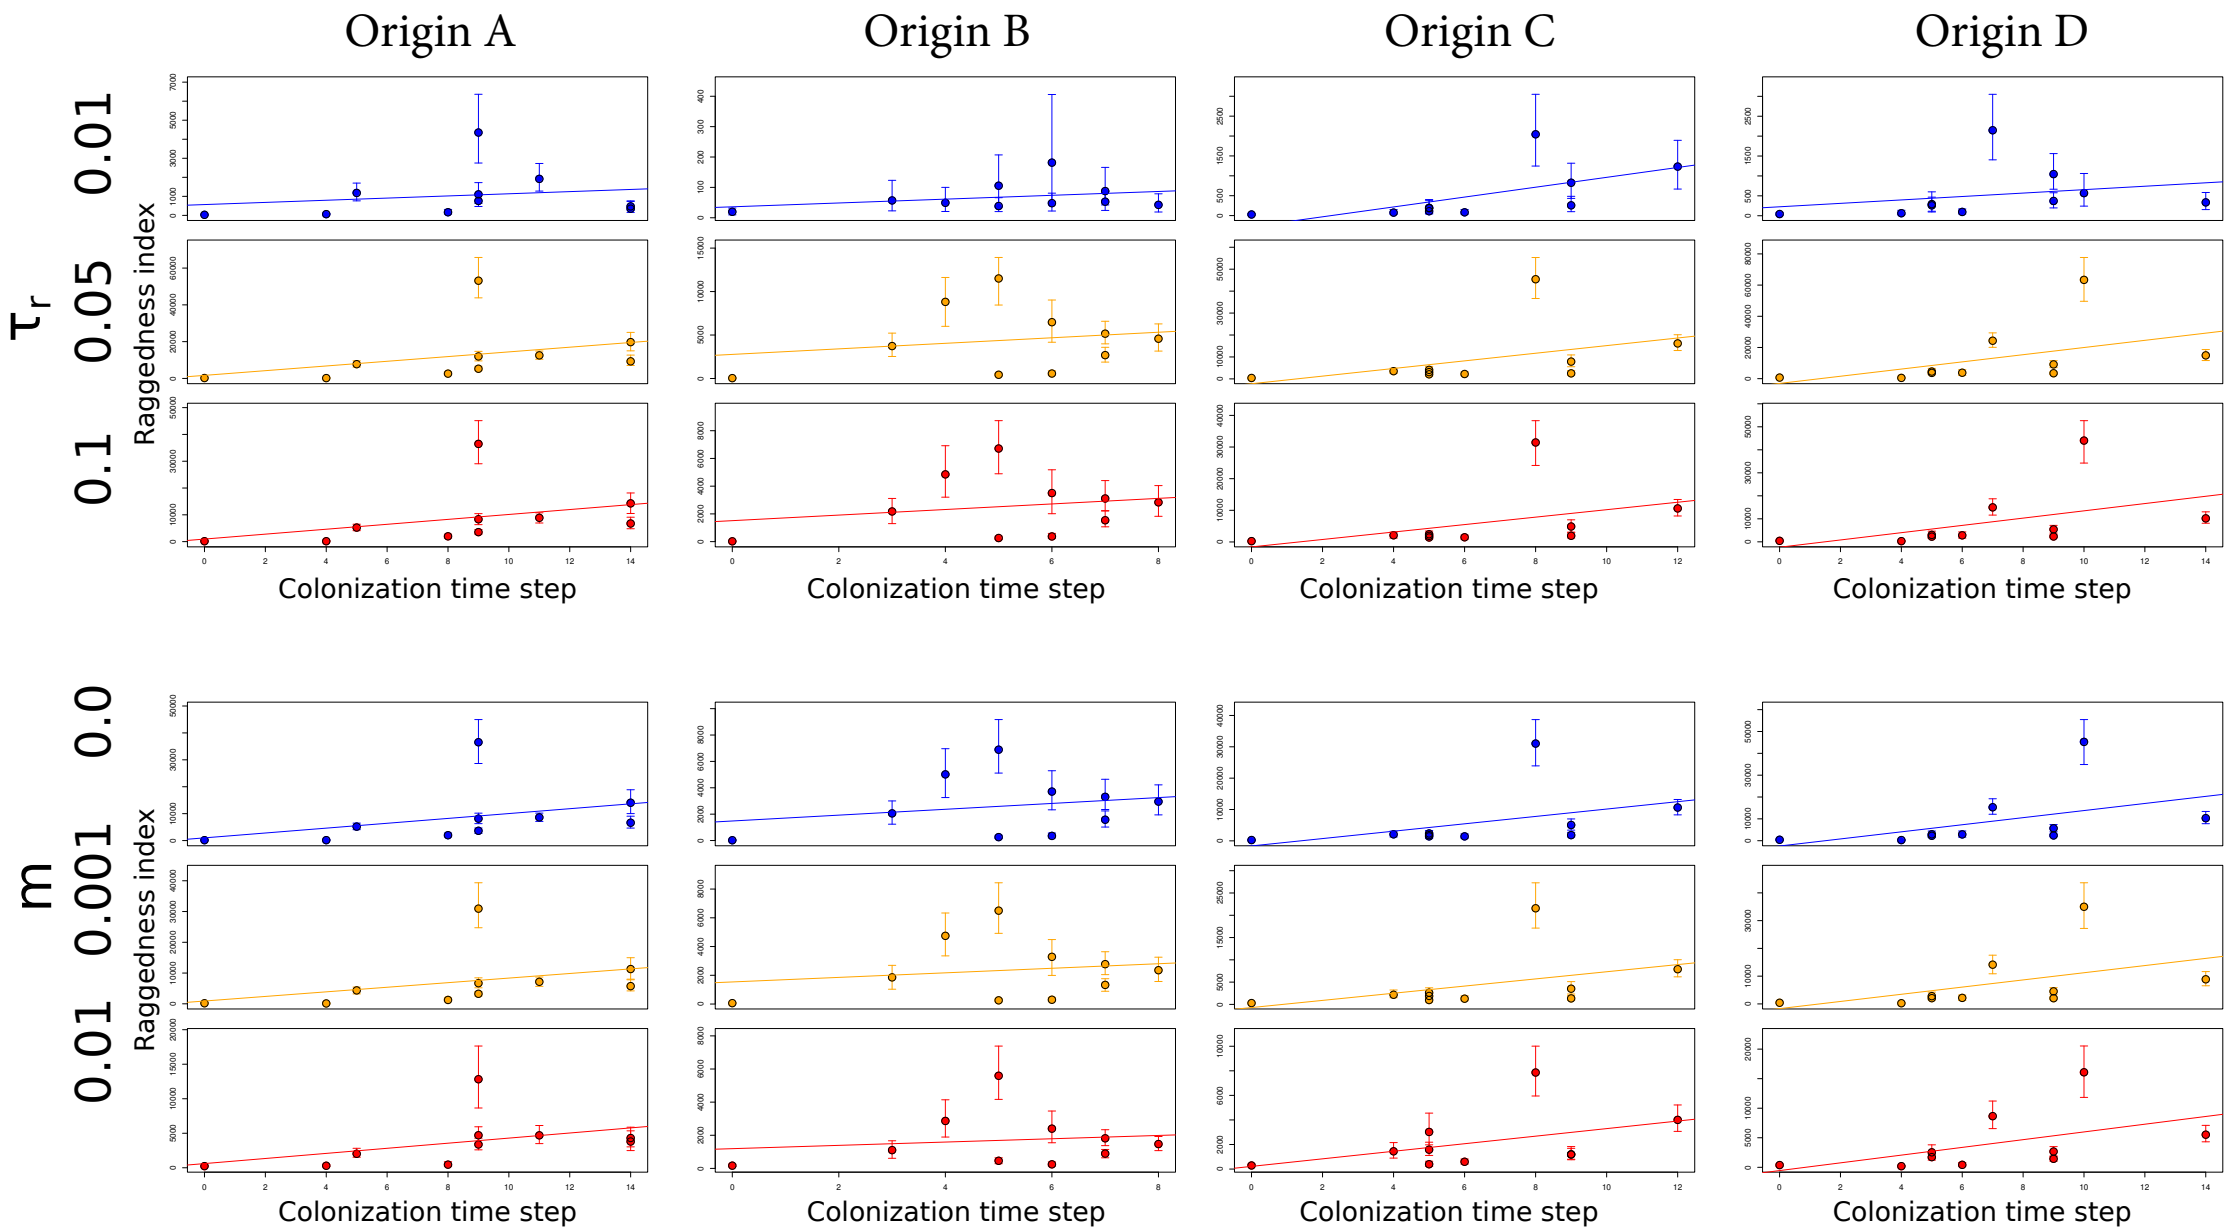

Fig. 3b

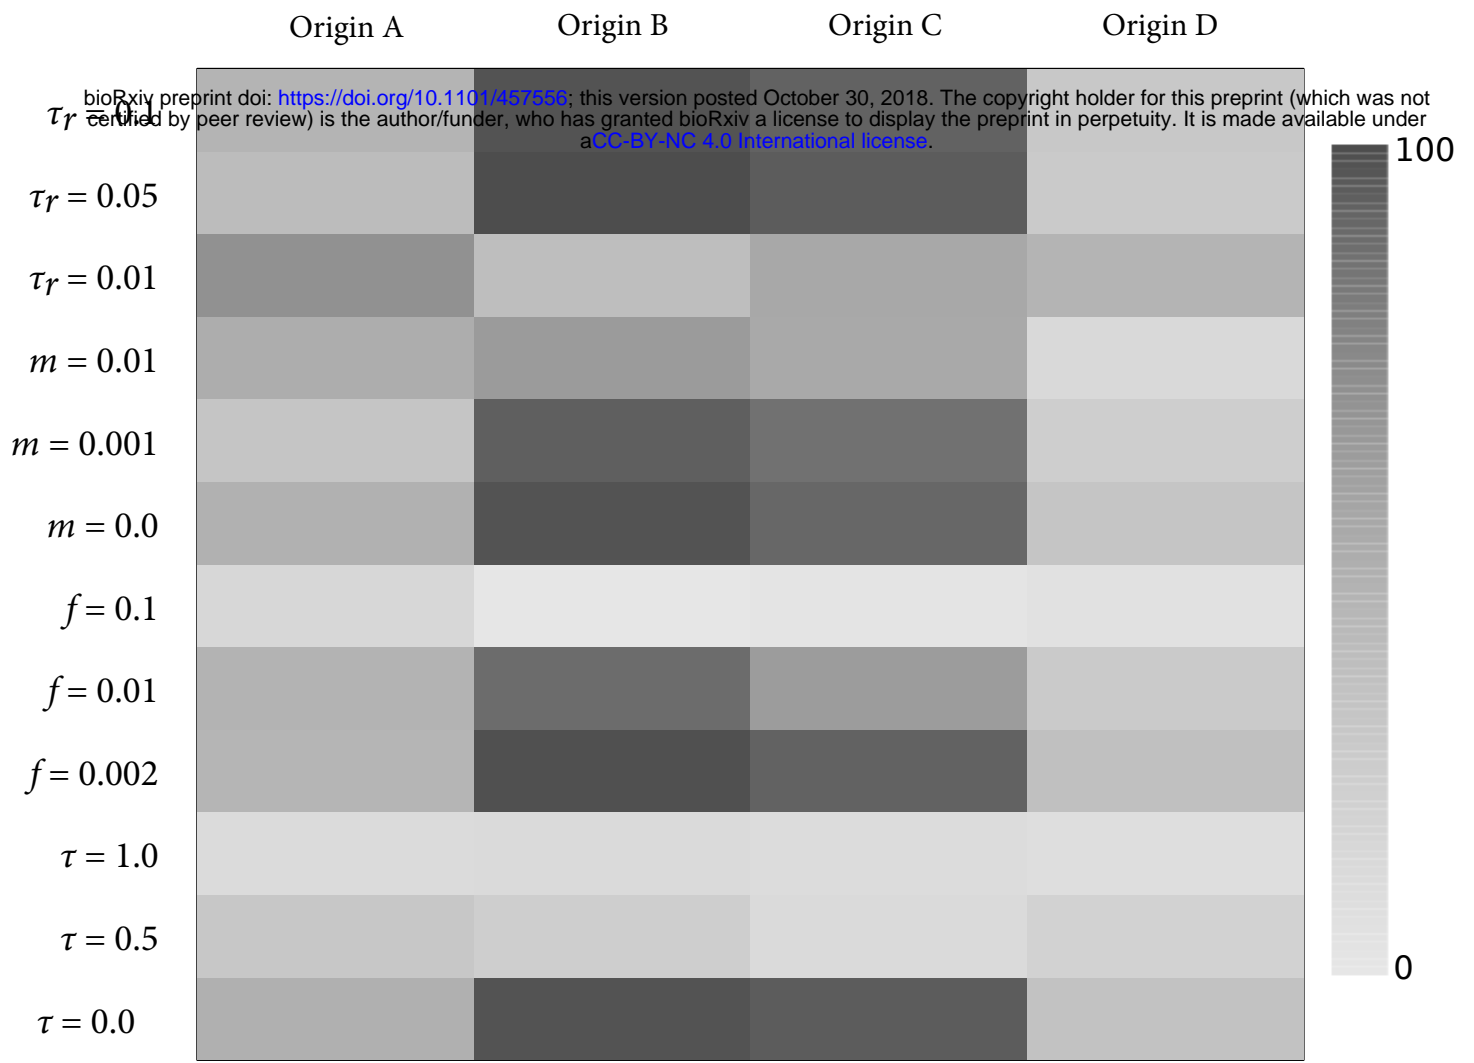

**Fig. 4**

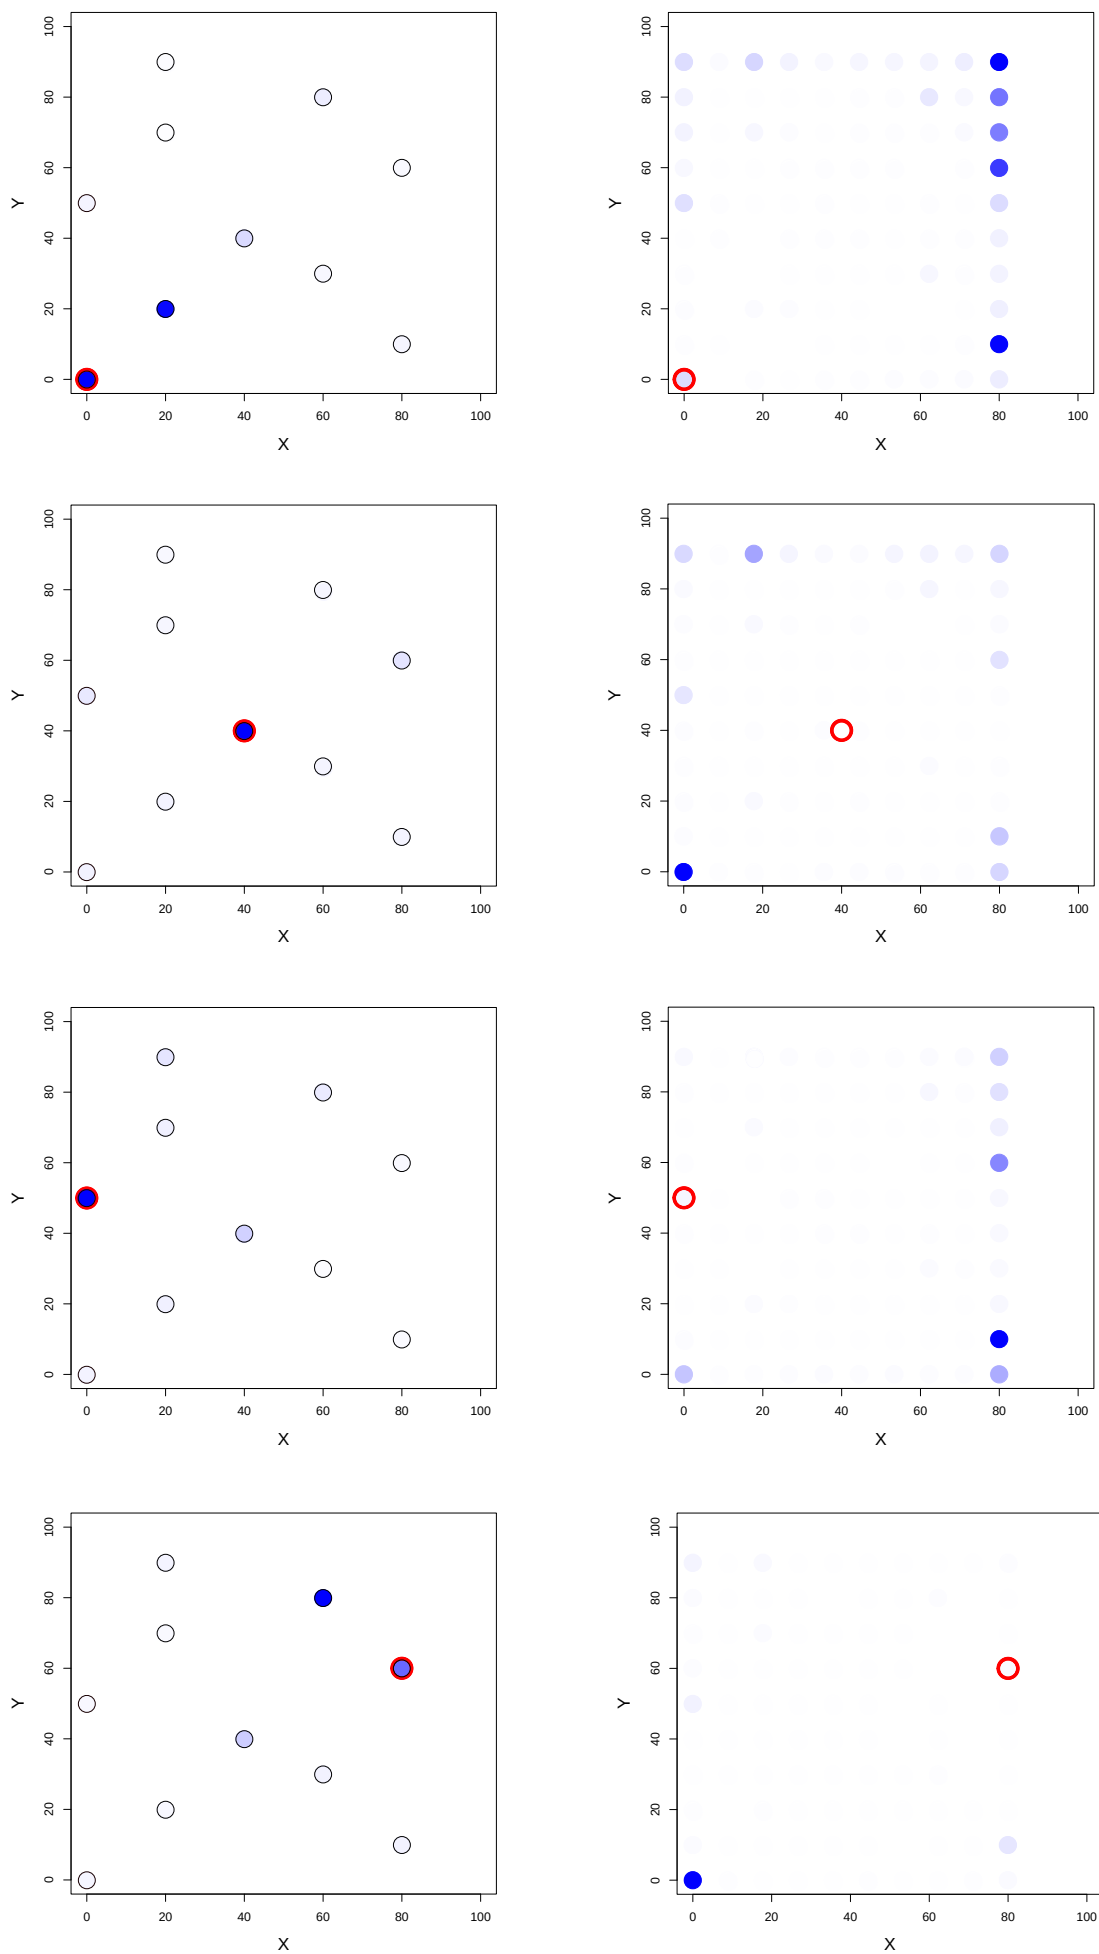

Fig. 5

a)

bioRxiv preprint doi: <https://doi.org/10.1101/457556>; this version posted October 30, 2018. The copyright holder for this preprint (which was not certified by peer review) is the author/funder, who has granted bioRxiv a license to display the preprint in perpetuity. It is made available under aCC-BY-NC 4.0 International license.

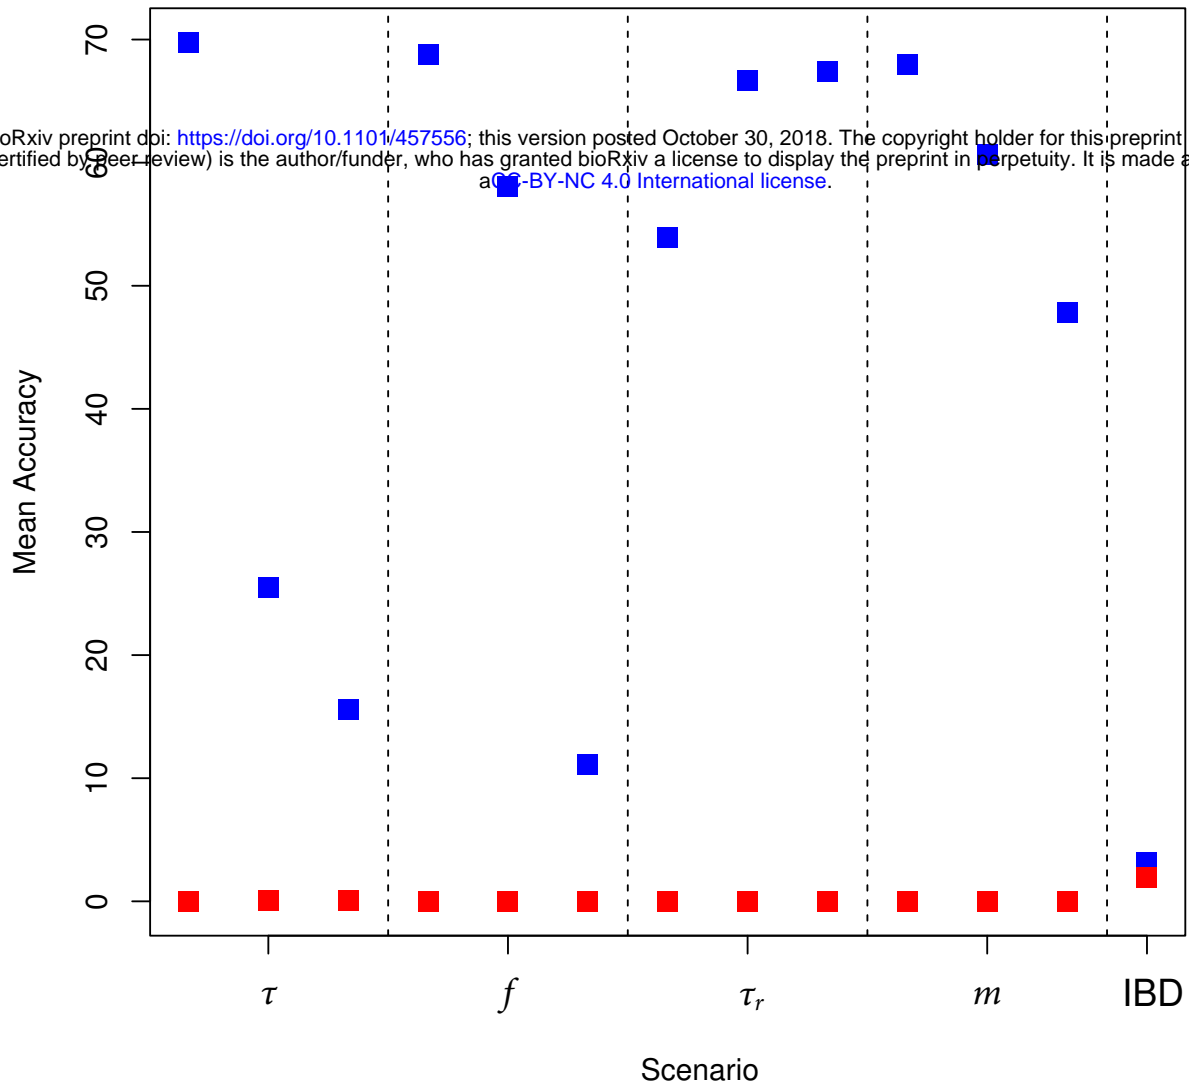

b)

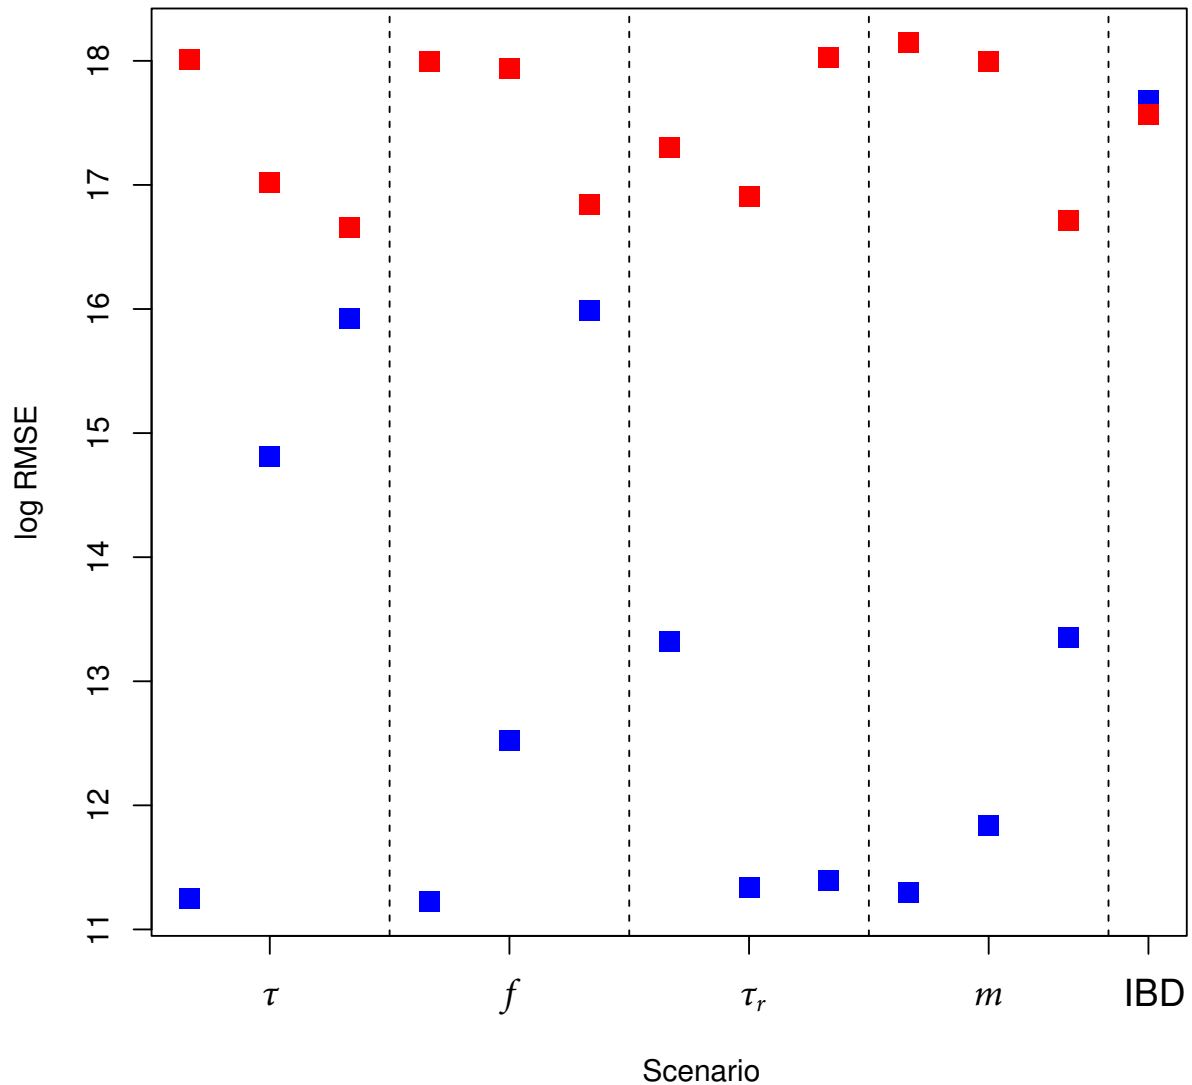

Fig. 6

a)

bioRxiv preprint doi: <https://doi.org/10.1101/457556>; this version posted October 30, 2018. The copyright holder for this preprint (which was not certified by peer review) is the author/funder, who has granted bioRxiv a license to display the preprint in perpetuity. It is made available under aCC-BY-NC 4.0 International license.

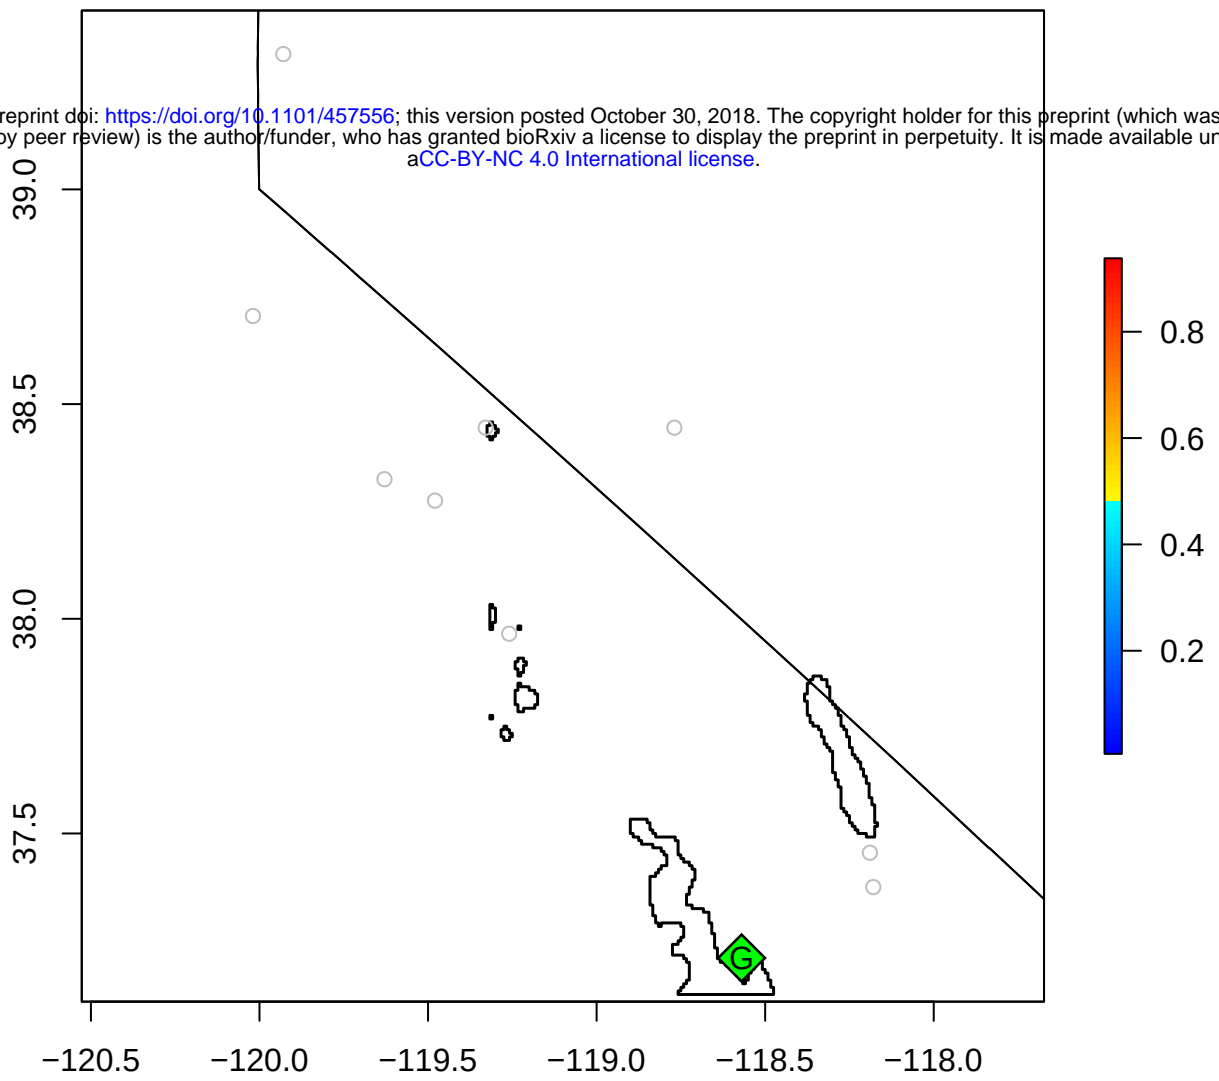

b)

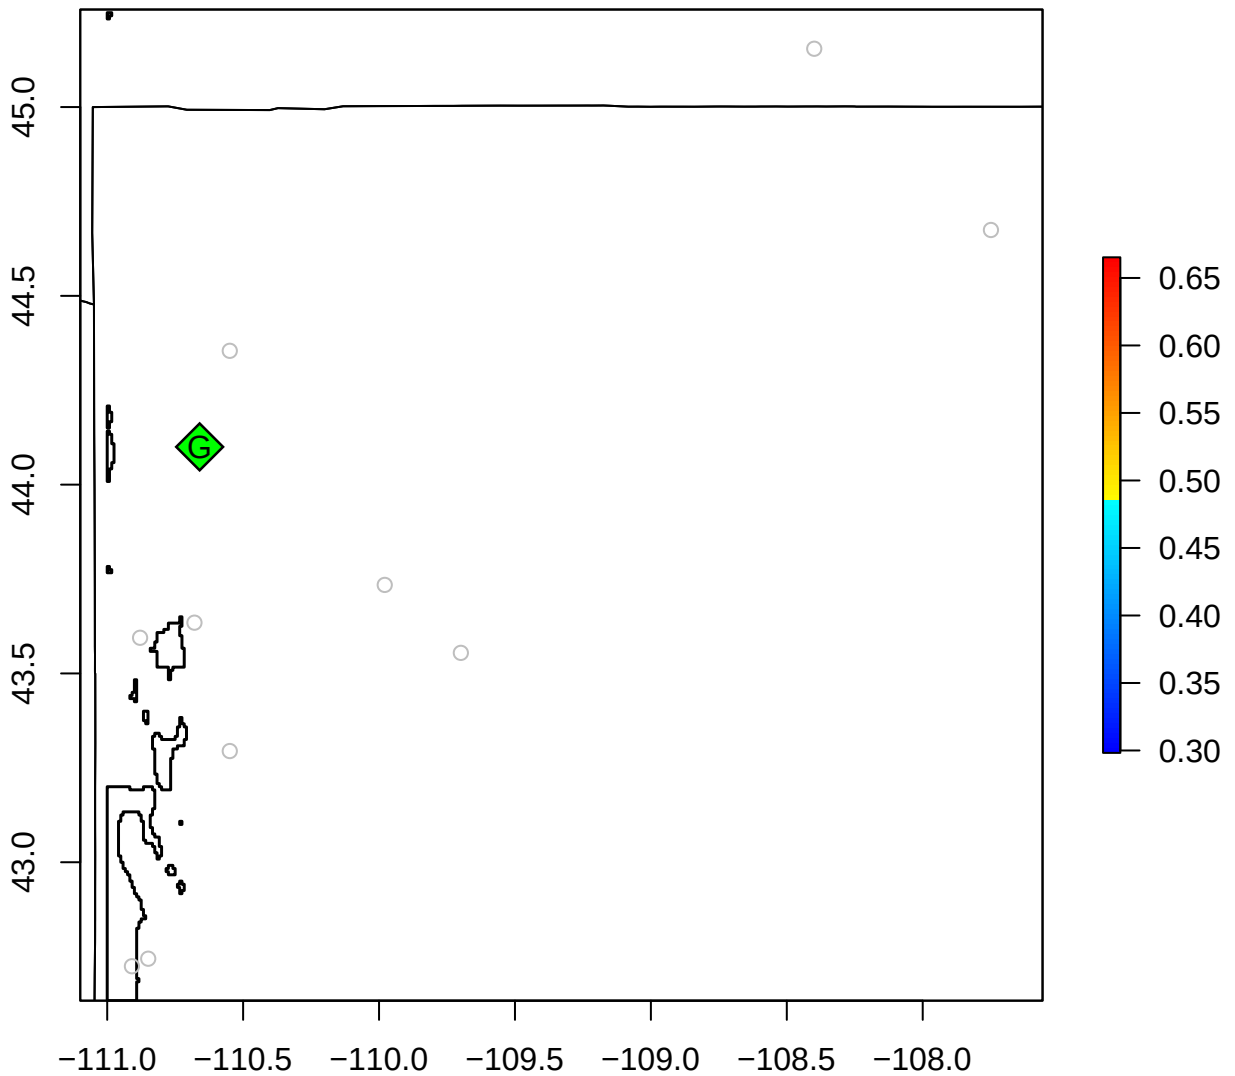

Fig. 7

| <b>Taxon</b> | <b>Features</b> | <b>Regularization Multiplier</b> | <b>Mean OR.10</b> | <b>Mean AUC</b> | <b>AICc</b> | <b>No. parameters</b> |
|--------------|-----------------|----------------------------------|-------------------|-----------------|-------------|-----------------------|
| Alpine       | L               | 1                                | 0.2               | 0.89182         | 206.6493599 | 3                     |
| Alpine       | L               | 1.5                              | 0.2               | 0.89661         | 203.2155179 | 2                     |
| Alpine       | H               | 1                                | 0.2               | 0.91757         | -           | 10                    |
| Alpine       | LQ              | 2.5                              | 0.2               | 0.92362         | 192.4424708 | 2                     |
| Alpine       | LQ              | 3                                | 0.2               | 0.92511         | 191.7289706 | 1                     |
| Alpine       | LQ              | 3.5                              | 0.2               | 0.92638         | 192.100387  | 1                     |
| Alpine       | LQ              | 4                                | 0.2               | 0.926675        | 192.481438  | 1                     |
| Alpine       | LQ              | 2                                | 0.2               | 0.942205        | 189.4175236 | 2                     |
| Alpine       | LQ              | 1.5                              | 0.2               | 0.953875        | 186.7180064 | 2                     |
| Alpine       | LQ              | 1                                | 0.2               | 0.954975        | 188.7346517 | 3                     |
| Alpine       | L               | 4                                | 0.3               | 0.894535        | 204.4186749 | 2                     |
| Alpine       | L               | 3.5                              | 0.3               | 0.894875        | 204.1054873 | 2                     |
| Alpine       | L               | 3                                | 0.3               | 0.896515        | 203.8267215 | 2                     |
| Alpine       | L               | 2                                | 0.3               | 0.896815        | 203.3794817 | 2                     |
| Alpine       | L               | 2.5                              | 0.3               | 0.89716         | 203.5840395 | 2                     |
| Alpine       | H               | 1.5                              | 0.3               | 0.919485        | -           | 9                     |
| Alpine       | LQ              | 0.5                              | 0.3               | 0.948905        | 191.9917093 | 4                     |
| Alpine       | H               | 3.5                              | 0.4               | 0.900645        | 213.0286531 | 4                     |
| Alpine       | H               | 3                                | 0.4               | 0.904335        | 210.8766708 | 4                     |
| Alpine       | H               | 2                                | 0.4               | 0.921855        | 254.9666543 | 7                     |
| Alpine       | L               | 0.5                              | 0.5               | 0.895105        | 232.219168  | 6                     |
| Alpine       | H               | 4                                | 0.5               | 0.898295        | 224.3725035 | 5                     |
| Alpine       | H               | 2.5                              | 0.5               | 0.906895        | 215.6799301 | 5                     |
| Alpine       | H               | 0.5                              | 0.6               | 0.89088         | -           | 23                    |
| Jackson      | H               | 3.5                              | 0.090909091       | 0.7772409       | 276.9584756 | 6                     |
| Jackson      | H               | 4                                | 0.090909091       | 0.7773182       | 296.5895898 | 7                     |
| Jackson      | H               | 3                                | 0.090909091       | 0.7773864       | -           | 12                    |
| Jackson      | H               | 2                                | 0.090909091       | 0.8230182       | -           | 12                    |
| Jackson      | H               | 2.5                              | 0.090909091       | 0.8234773       | -           | 14                    |
| Jackson      | LQ              | 4                                | 0.181818182       | 0.7101455       | 251.8684554 | 1                     |
| Jackson      | L               | 3.5                              | 0.272727273       | 0.60175         | 258.7359365 | 1                     |
| Jackson      | L               | 4                                | 0.272727273       | 0.6024864       | 259.499018  | 1                     |
| Jackson      | LQ              | 3.5                              | 0.272727273       | 0.6793591       | 251.7077368 | 2                     |
| Jackson      | L               | 0.5                              | 0.272727273       | 0.7016091       | 263.8753876 | 5                     |

|         |    |     |             |           |             |    |
|---------|----|-----|-------------|-----------|-------------|----|
| Jackson | L  | 1   | 0.272727273 | 0.7086545 | 254.3545529 | 3  |
| Jackson | LQ | 1   | 0.272727273 | 0.8240091 | 251.79814   | 4  |
| Jackson | LQ | 1.5 | 0.272727273 | 0.8318727 | 247.5532945 | 3  |
| Jackson | LQ | 2.5 | 0.272727273 | 0.8378864 | 246.4362601 | 2  |
| Jackson | LQ | 2   | 0.272727273 | 0.8389182 | 244.8357271 | 2  |
| Jackson | L  | 2.5 | 0.363636364 | 0.5528318 | 258.4254047 | 2  |
| Jackson | L  | 3   | 0.363636364 | 0.5833864 | 258.0480926 | 1  |
| Jackson | L  | 2   | 0.363636364 | 0.64355   | 255.1049989 | 2  |
| Jackson | L  | 1.5 | 0.363636364 | 0.6852545 | 256.5961569 | 3  |
| Jackson | LQ | 0.5 | 0.363636364 | 0.7837682 | 285.3357205 | 7  |
| Jackson | LQ | 3   | 0.363636364 | 0.7894136 | 248.625469  | 2  |
| Jackson | H  | 1.5 | 0.363636364 | 0.8025455 | -           | 14 |
| Jackson | H  | 1   | 0.454545455 | 0.7811682 | -           | 17 |
| Jackson | H  | 0.5 | 0.818181818 | 0.6934545 | -           | 45 |



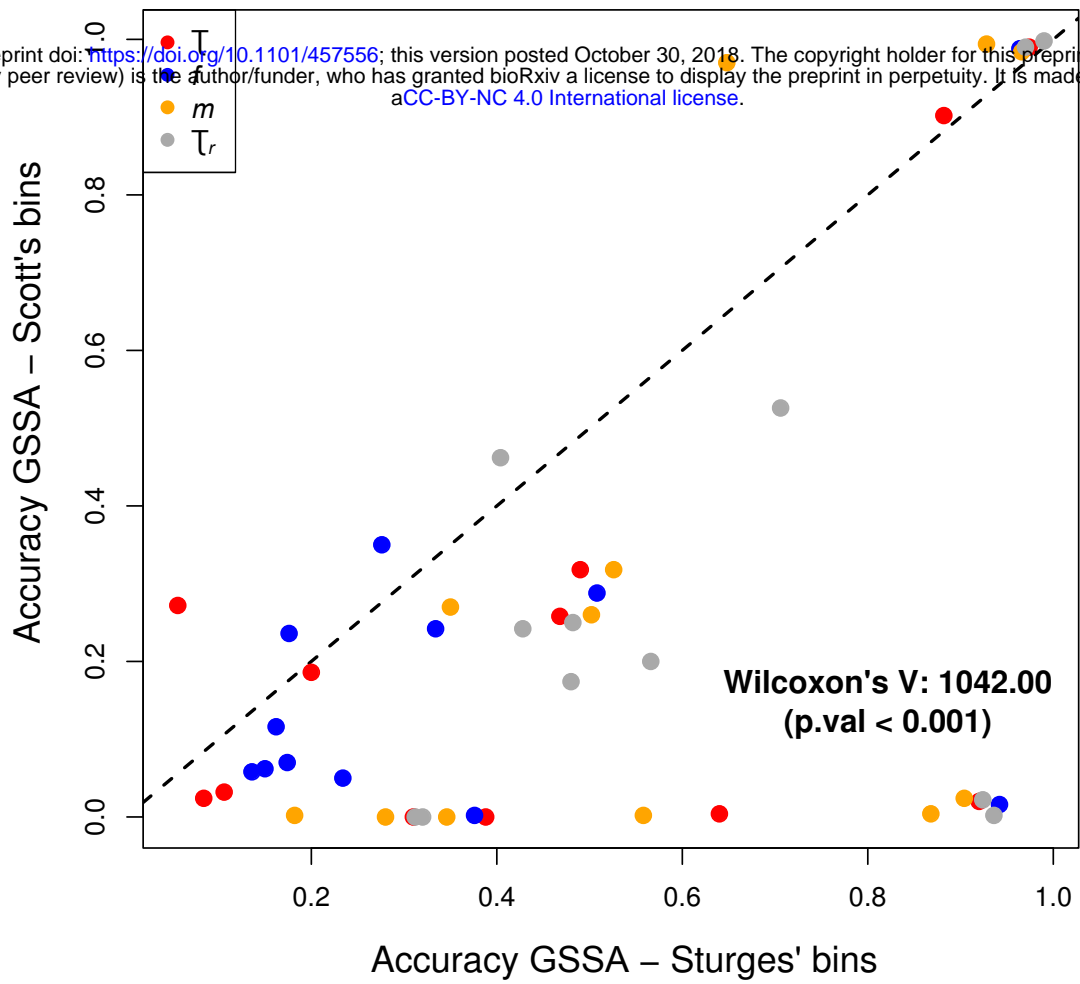

b)

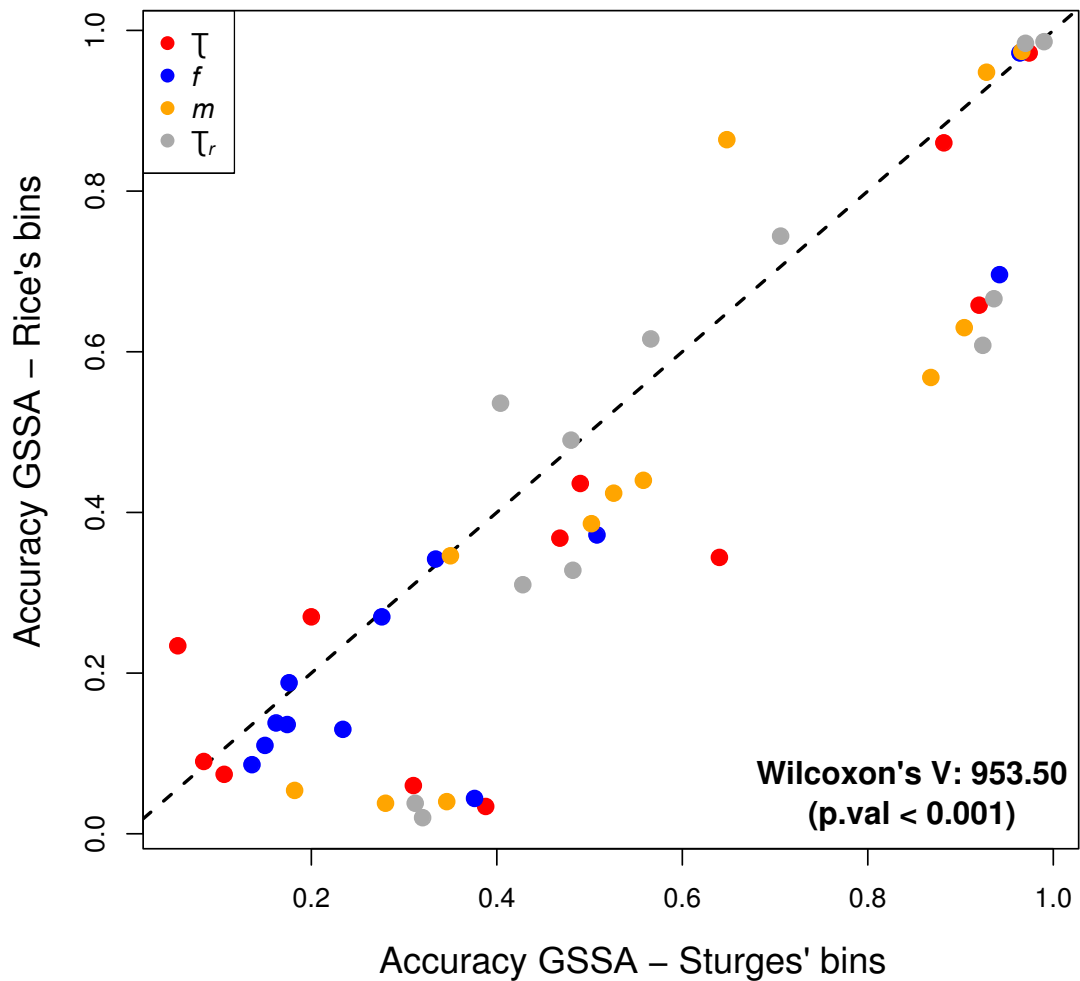

Fig. S1

a)

### Furthest away locality

bioRxiv preprint doi: <https://doi.org/10.1101/457556>; this version posted October 30, 2018. The copyright holder for this preprint (which was not certified by peer review) is the author/funder, who has granted bioRxiv a license to display the preprint in perpetuity. It is made available under aCC-BY-NC 4.0 International license.

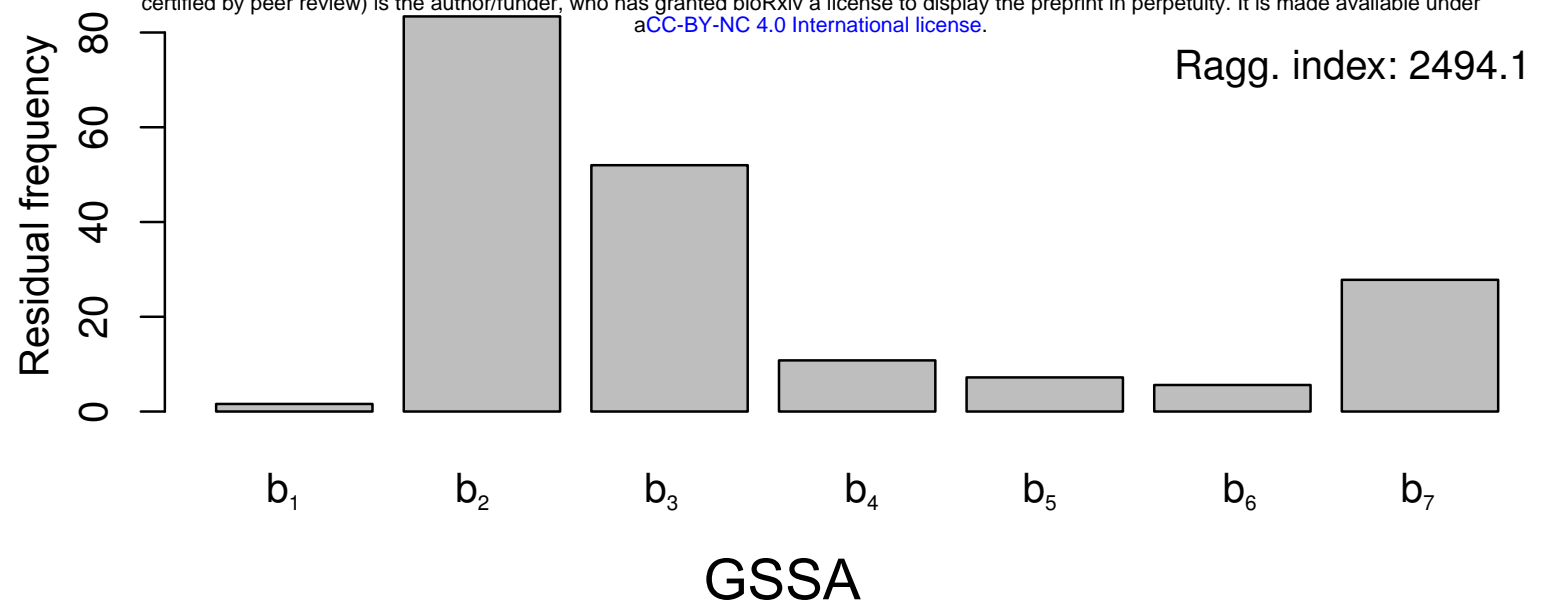

b)

### Expansion source

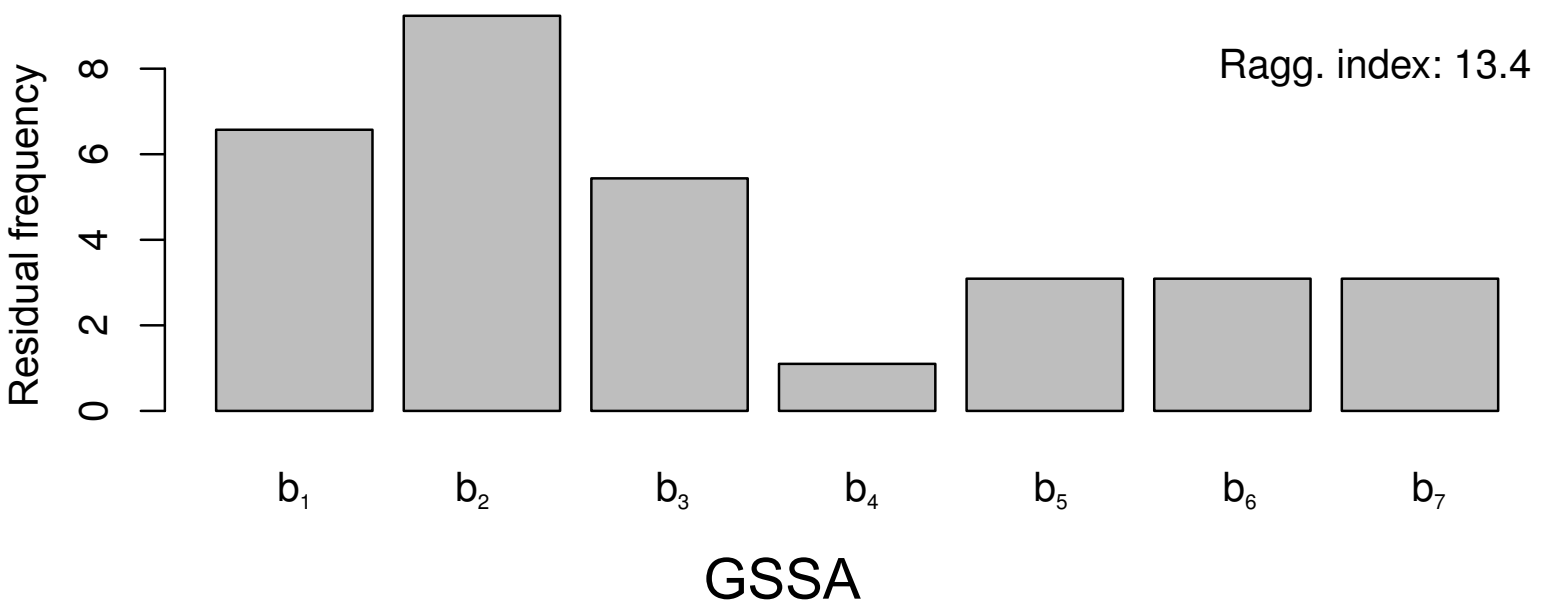

Fig. S2

a)

Origin A

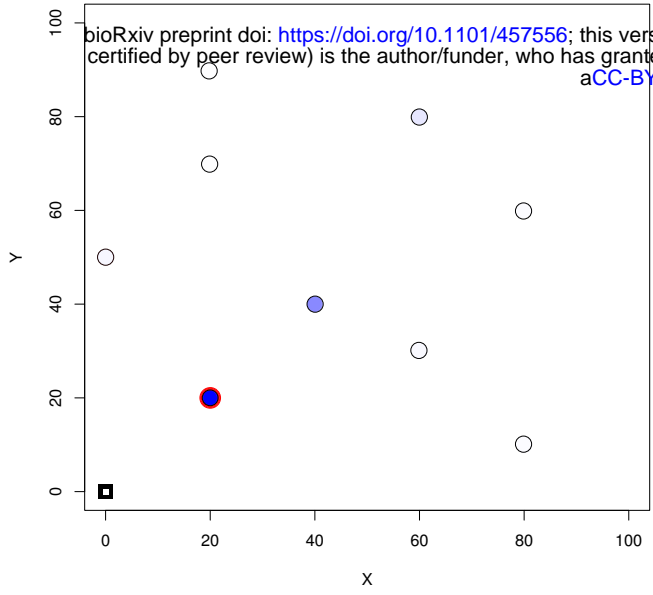

b)

Origin B

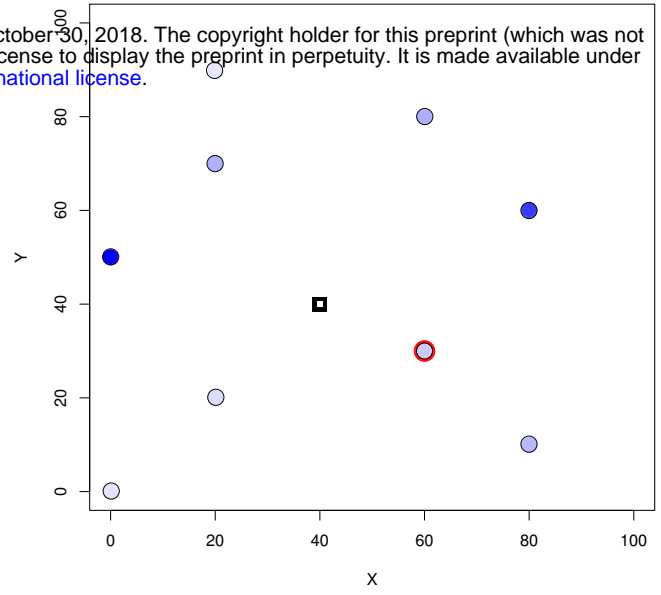

c)

Origin C

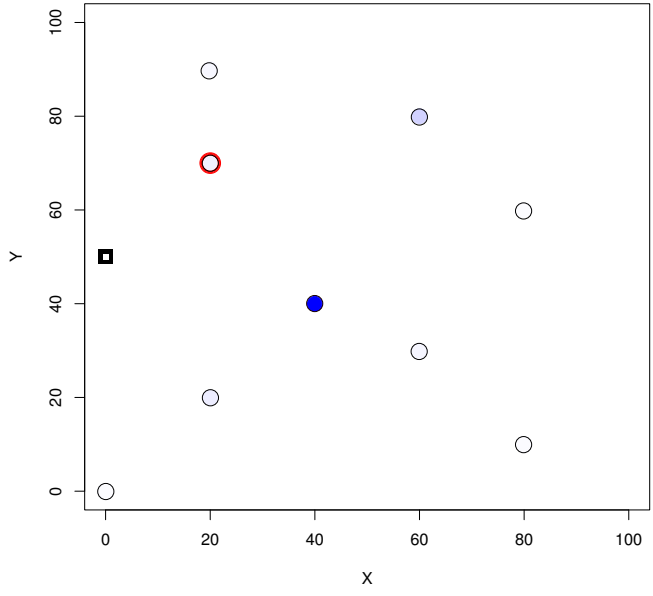

d)

Origin D

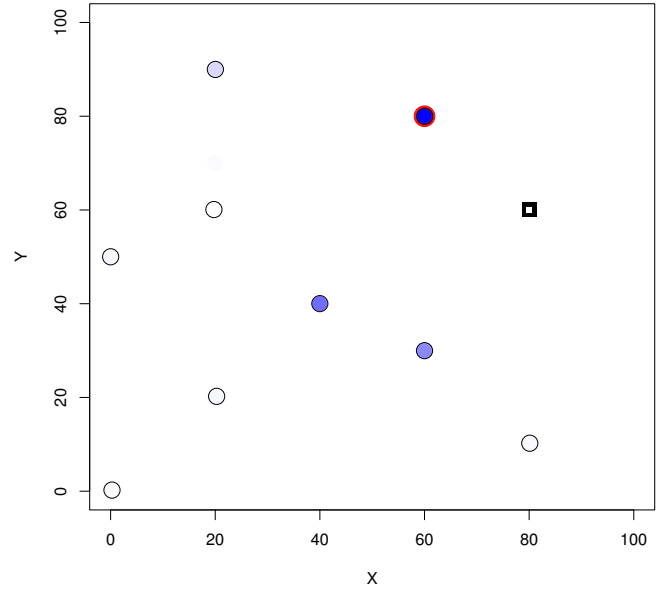

Fig. S3
